# Supplementary material for: Structural insights into hormone recognition by the human glucose-dependent insulinotropic polypeptide receptor
Source: eLife. 2021 Jul 13;10:e68719. doi: 10.7554/eLife.68719 (PMC8298097; doi:10.7554/eLife.68719)
Supplement: Figure 1—source data 1. [file elife-68719-fig1-data1.xlsx]

## Sheet: Figure 1—source data 1
Figure 1—source data 1. Effects of GIP1-42-mediated cAMP accumulation and binding affinitya.
Receptor		cAMP accumulation		Binding
		pEC50 ± S.E.M.	Emax (% WTb)	pIC50 ± S.E.M.	Span ± S.E.M.
GIPR(22-466)(WT)		10.91 ± 0.03	99.91 ± 0.92	8.04 ± 0.07	99.64 ± 3.19
BRIL-GIPR(22-421)T345F-15AA-LgBiT-2MBP		10.63 ± 0.06	100.84 ± 1.78	8.33 ± 0.16	50.09 ± 3.69*
aAll data were fitted with a three-parameter logistic curve to obtain pEC50 and pIC50 values. Data represent means ± S.E.M. of at least three independent experiments performed duplicate. Statistical significance was determined with a two-tailed Student’s t-test (*P< 0.001).
bWT, wild type
