# Supplementary material for: Structural insights into hormone recognition by the human glucose-dependent insulinotropic polypeptide receptor
Source: eLife. 2021 Jul 13;10:e68719. doi: 10.7554/eLife.68719 (PMC8298097; doi:10.7554/eLife.68719)
Supplement: Figure 2—source data 1. [file elife-68719-fig2-data1.xlsx]

## Sheet: Figure 2—source data 1
Figure 2—source data 1. Effects of residue mutation in the ligand-binding pocket on GIP1-42-induced cAMP accumulation, cell surface expression and binding affinity.
Mutant	cAMP accumulation		Cell surface expression (% WT)	Binding
	pEC50 ± S.E.M.	Emax (% WT)		pIC50 ± S.E.M.	Span ± S.E.M.
Wild type	11.27 ± 0.04	99.40 ± 1.35	100	7.91 ± 0.06	98.63 ± 2.61*
L35A	10.01 ± 0.05	100.78 ± 2.12	92.34 ±1.98	N.A.	3.86 ± 0.64*
W39A	N.A.	N.A.	49.20 ±3.42*	N.A.	3.03 ± 0.81*
D66A	N.A.	N.A.	42.83 ±5.19*	N.A.	1.56 ± 1.01*
Y68A	6.79 ± 2.89*	N.A.	71.97 ±2.60*	N.A.	2.08 ± 0.00*
Y87A	N.A.	N.A.	25.74 ±1.93*	N.A.	2.00 ± 0.66*
L88A	N.A.	N.A.	26.54 ±2.59*	N.A.	2.31 ± 1.13*
N120A	10.28 ± 0.07	100.08 ± 2.38	78.97 ±4.01*	8.01 ± 0.09	46.38 ± 1.90*
E122A	10.57 ± 0.08	99.09 ± 2.66	74.45 ±4.94*	8.14 ± 0.17	53.28 ± 4.11*
L134A	10.05 ± 0.07	98.09 ± 2.41	63.58 ±3.10*	7.69 ± 0.48	16.35 ± 3.81*
Y141A	9.26 ± 0.06	100.60 ± 3.27	136.6 ±3.31*	7.08 ± 0.29	13.88 ± 2.27*
R289A	10.48 ± 0.06	100.31 ± 2.32	82.02 ±1.25	7.27 ± 0.35	7.19 ± 1.34*
W296A	9.57 ± 0.05	103.12 ± 2.45	85.60 ±3.65	7.14 ± 0.16	31.84 ± 2.81*
R370A	9.53 ± 0.06	103.46 ± 2.89	129.4 ±2.66*	7.52 ± 0.23	15.09 ± 1.77*
L374A	9.66 ± 0.05	102.66 ± 2.29	78.92 ±1.16	7.33 ± 0.43	8.35 ± 1.88*
I378A	10.34 ± 0.06	99.68 ± 2.01	61.81 ±3.06*	7.31 ± 0.26	14.13 ± 1.97*
T345F	11.00 ± 0.05	96.24 ± 1.71	111.7 ±3.46	7.87 ± 0.07	96.16 ± 3.03
Δ29	11.37 ± 0.08	99.03 ± 2.13	87.94 ±3.55	7.87 ± 0.07	90.93 ± 4.76
Δ43	N.A.	N.A.	30.39 ±3.18*	N.A.	3.91 ± 3.99 *
Δ52	N.A.	N.A.	32.83 ±1.99*	N.A.	N.A.
cAMP accumulation assay was performed in HEK 293T cells. All the mutant constructs were modified by single-point mutation in the setting of the wild type (WT) construct (HA-Flag-3GSA-GIPR(22-466)). cAMP accumulation data were analyzed using a three-parameter logistic equation to determine pEC50 and Emax values. Emax values for mutants are expressed as a percentage of the WT. Cell surface expressi…
