# Supplementary material for: Structural insights into hormone recognition by the human glucose-dependent insulinotropic polypeptide receptor
Source: eLife journal article supplement (doi:10.7554/elife.68719), 2021-07-13
Supplement: supp [file Figure 1—figure supplement 1C-source data 1.xlsx]

## Sheet: Figure 1—figure supplement 1C
Figure 1—figure supplement 1C-source data 1
superose 6 24ml eltue
GIP1-42-hGIPR(22-421)-15AA-LgBiT-Gs complex			GIP1-42-hGIPR(22-421)(T345F)-15AA-LgBiT-Gs complex
Volume (mL)	UV 280nm (mAU)		Volume (mL)	UV 280nm (mAU)
0	0.05		0	0.01
0.02	0.07		0.03	0.04
0.05	0.06		0.05	-0.02
0.07	0.07		0.08	-0.01
0.1	0.08		0.11	0
0.12	0.11		0.13	0.02
0.15	0.15		0.16	0.07
0.17	0.15		0.19	0.05
0.2	0.17		0.21	0.2
0.22	0.17		0.24	0.79
0.25	0.2		0.27	0.83
0.27	0.19		0.29	0.76
0.3	0.25		0.32	0.64
0.32	0.25		0.35	0.53
0.35	0.25		0.37	0.51
0.37	0.28		0.4	0.44
0.4	0.29		0.43	0.42
0.42	0.33		0.45	0.42
0.45	0.34		0.48	0.4
0.47	0.37		0.51	0.38
0.5	0.43		0.53	0.38
0.52	0.42		0.56	0.37
0.55	0.46		0.59	0.38
0.57	0.5		0.61	0.38
0.6	0.53		0.64	0.38
0.62	0.57		0.67	0.36
0.65	0.62		0.69	0.38
0.67	0.65		0.72	0.37
0.7	0.69		0.75	0.38
0.72	0.73		0.77	0.37
0.75	0.76		0.8	0.4
0.77	0.8		0.83	0.39
0.8	0.84		0.85	0.4
0.82	0.87		0.88	0.42
0.85	0.93		0.91	0.4
0.87	0.94		0.93	0.4
0.9	0.99		0.96	0.4
0.92	1.02		0.99	0.42
0.95	1.04		1.01	0.43
0.97	1.08		1.04	0.44
1	1.11		1.07	0.43
1.02	1.16		1.09	0.45
1.05	1.2		1.12	0.45
1.07	1.21		1.15	0.47
1.1	1.24		1.17	0.46
1.12	1.25		1.2	0.46
1.15	1.25		1.23	0.49
1.17	1.26		1.25	0.48
1.2	1.28		1.28	0.5
1.22	1.32		1.31	0.49
1.25	1.31		1.33	0.47
1.27	1.33		1.36	0.47
1.3	1.32		1.39	0.5
1.32	1.33		1.41	0.51
1.35	1.36		1.44	0.5
1.37	1.35		1.47	0.51
1.4	1.35		1.49	0.52
1.42	1.35		1.52	0.54
1.45	1.35		1.55	0.55
1.47	1.34		1.57	0.53
1.5	1.33		1.6	0.56
1.52	1.35		1.63	0.52
1.55	1.32		1.65	0.55
1.57	1.3		1.68	0.55
1.6	1.29		1.71	0.55
1.62	1.27		1.73	0.57
1.65	1.24		1.76	0.58
1.67	1.24		1.79	0.59
1.7	1.22		1.81	0.59
1.72	1.16		1.84	0.59
1.75	1.15		1.87	0.61
1.77	1.13		1.89	0.59
1.8	1.1		1.92	0.6
1.82	1.07		1.95	0.62
1.85	1.01		1.97	0.61
1.87	0.95		2	0.66
1.9	0.9		2.03	0.63
1.92	0.89		2.05	0.64
1.95	0.82		2.08	0.6
1.97	0.78		2.11	0.66
2	0.73		2.13	0.65
2.02	0.66		2.16	0.65
2.05	0.62		2.19	0.69
2.07	0.57		2.21	0.68
2.1	0.48		2.24	0.67
2.12	0.42		2.27	0.69
2.15	0.35		2.29	0.7
2.17	0.29		2.32	0.71
2.2	0.22		2.34	0.71
2.22	0.15		2.37	0.74
2.25	0.08		2.4	0.73
2.27	0.04		2.42	0.75
2.3	-0.02		2.45	0.74
2.32	-0.07		2.48	0.74
2.35	-0.04		2.5	0.76
2.37	-0.09		2.53	0.77
2.4	-0.15		2.56	0.79
2.42	-0.23		2.58	0.78
2.45	-0.28		2.61	0.79
2.47	-0.33		2.64	0.78
2.5	-0.35		2.66	0.8
2.52	-0.3		2.69	0.79
2.55	-0.27		2.72	0.81
2.57	-0.32		2.74	0.82
2.6	-0.37		2.77	0.84
2.62	-0.39		2.8	0.83
2.65	-0.44		2.82	0.85
2.67	-0.44		2.85	0.85
2.7	-0.47		2.88	0.87
2.72	-0.49		2.9	0.87
2.75	-0.48		2.93	0.86
2.77	-0.52		2.96	0.87
2.8	-0.53		2.98	0.9
2.82	-0.55		3.01	0.89
2.85	-0.59		3.04	0.88
2.87	-0.59		3.06	0.91
2.9	-0.63		3.09	0.92
2.92	-0.65		3.12	0.91
2.95	-0.68		3.14	0.91
2.97	-0.7		3.17	0.91
3	-0.74		3.2	0.93
3.02	-0.73		3.22	0.92
3.05	-0.77		3.25	0.93
3.07	-0.79		3.28	0.93
3.1	-0.85		3.3	0.93
3.12	-0.85		3.33	0.95
3.15	-0.9		3.36	0.97
3.17	-0.93		3.38	0.97
3.2	-0.94		3.41	0.95
3.22	-0.97		3.44	0.95
3.25	-0.98		3.46	0.96
3.27	-1.01		3.49	0.96
3.3	-1		3.52	0.97
3.32	-1.02		3.54	0.99
3.35	-1.05		3.57	1
3.37	-1.06		3.6	0.99
3.4	-1.05		3.62	0.98
3.42	-1.07		3.65	1
3.45	-1.06		3.68	1
3.47	-1.06		3.7	1.01
3.5	-1.07		3.73	1
3.52	-1.08		3.76	0.99
3.55	-1.1		3.78	1.01
3.57	-1.08		3.81	1.04
3.6	-1.1		3.84	1.04
3.62	-1.1		3.86	1.01
3.65	-1.1		3.89	1.03
3.67	-1.09		3.92	1.04
3.7	-1.11		3.94	1.01
3.72	-1.06		3.97	1.02
3.75	-1.1		4	1.05
3.77	-1.07		4.02	1.04
3.8	-1.07		4.05	1.03
3.82	-1.06		4.08	1.04
3.85	-1.05		4.1	1.06
3.87	-1.05		4.13	1.06
3.9	-1.04		4.16	1.07
3.92	-1.07		4.18	1.06
3.95	-1.05		4.21	1.06
3.97	-1.03		4.24	1.09
4	-1.04		4.26	1.07
4.02	-1.02		4.29	1.08
4.05	-1		4.32	1.07
4.07	-0.99		4.34	1.09
4.1	-1.03		4.37	1.1
4.12	-1.01		4.4	1.1
4.15	-1.01		4.42	1.09
4.17	-1		4.45	1.11
4.2	-1.02		4.48	1.09
4.22	-1.02		4.5	1.11
4.25	-1		4.53	1.13
4.27	-1		4.56	1.11
4.3	-1		4.58	1.12
4.32	-1		4.61	1.1
4.35	-1.01		4.64	1.11
4.37	-1.02		4.66	1.11
4.4	-0.99		4.69	1.12
4.42	-1.01		4.72	1.13
4.45	-0.99		4.74	1.13
4.47	-0.98		4.77	1.13
4.5	-1		4.8	1.12
4.52	-1.02		4.82	1.13
4.55	-0.99		4.85	1.14
4.57	-0.99		4.88	1.15
4.6	-1		4.9	1.16
4.62	-0.99		4.93	1.16
4.65	-1		4.96	1.14
4.67	-1.01		4.98	1.15
4.7	-1.01		5.01	1.16
4.72	-0.99		5.04	1.16
4.75	-0.99		5.06	1.16
4.77	-0.98		5.09	1.15
4.8	-1.01		5.12	1.17
4.82	-0.98		5.14	1.16
4.85	-0.97		5.17	1.17
4.87	-0.99		5.2	1.16
4.9	-0.98		5.22	1.17
4.92	-1		5.25	1.2
4.95	-0.99		5.28	1.17
4.97	-0.98		5.3	1.16
5	-0.96		5.33	1.18
5.02	-0.98		5.36	1.17
5.05	-0.97		5.38	1.16
5.07	-0.96		5.41	1.17
5.1	-0.96		5.44	1.17
5.12	-0.97		5.46	1.19
5.15	-0.96		5.49	1.17
5.17	-0.96		5.52	1.19
5.2	-0.94		5.54	1.18
5.22	-0.97		5.57	1.2
5.25	-0.96		5.6	1.21
5.27	-0.98		5.62	1.19
5.3	-0.94		5.65	1.19
5.32	-0.96		5.68	1.2
5.35	-0.96		5.7	1.18
5.37	-0.96		5.73	1.18
5.4	-0.96		5.76	1.2
5.42	-0.93		5.78	1.19
5.44	-0.94		5.81	1.21
5.47	-0.93		5.84	1.19
5.49	-0.93		5.86	1.17
5.52	-0.95		5.89	1.17
5.54	-0.92		5.92	1.18
5.57	-0.91		5.94	1.15
5.59	-0.94		5.97	1.18
5.62	-0.92		6	1.17
5.64	-0.92		6.02	1.16
5.67	-0.93		6.05	1.14
5.69	-0.92		6.08	1.16
5.72	-0.9		6.1	1.15
5.74	-0.91		6.13	1.17
5.77	-0.89		6.16	1.14
5.79	-0.9		6.18	1.13
5.82	-0.87		6.21	1.14
5.84	-0.86		6.24	1.13
5.87	-0.86		6.26	1.11
5.89	-0.83		6.29	1.15
5.92	-0.84		6.32	1.11
5.94	-0.85		6.34	1.13
5.97	-0.81		6.37	1.12
5.99	-0.84		6.4	1.1
6.02	-0.84		6.42	1.1
6.04	-0.83		6.45	1.08
6.07	-0.83		6.48	1.08
6.09	-0.84		6.5	1.08
6.12	-0.85		6.53	1.07
6.14	-0.82		6.56	1.08
6.17	-0.83		6.58	1.06
6.19	-0.85		6.61	1.06
6.22	-0.85		6.64	1.05
6.24	-0.85		6.66	1.03
6.27	-0.81		6.69	1.03
6.29	-0.82		6.72	1.04
6.32	-0.85		6.74	1.03
6.34	-0.84		6.77	1.05
6.37	-0.82		6.8	1.04
6.39	-0.84		6.82	1.01
6.42	-0.81		6.85	1.03
6.44	-0.85		6.88	1.01
6.47	-0.83		6.9	1
6.49	-0.8		6.93	0.99
6.52	-0.79		6.95	0.98
6.54	-0.8		6.98	0.96
6.57	-0.8		7.01	0.97
6.59	-0.79		7.03	0.97
6.62	-0.78		7.06	0.95
6.64	-0.8		7.09	0.94
6.67	-0.77		7.11	0.96
6.69	-0.78		7.14	0.93
6.72	-0.77		7.17	0.93
6.74	-0.79		7.19	0.93
6.77	-0.77		7.22	0.93
6.79	-0.76		7.25	0.88
6.82	-0.76		7.27	0.91
6.84	-0.77		7.3	0.89
6.87	-0.73		7.33	0.86
6.89	-0.75		7.35	0.91
6.92	-0.75		7.38	0.93
6.94	-0.72		7.41	0.91
6.97	-0.73		7.43	0.89
6.99	-0.74		7.46	0.88
7.02	-0.72		7.49	0.87
7.04	-0.73		7.51	0.87
7.07	-0.72		7.54	0.85
7.09	-0.7		7.57	0.85
7.12	-0.72		7.59	0.85
7.14	-0.69		7.62	0.86
7.17	-0.68		7.65	0.83
7.19	-0.68		7.67	0.85
7.22	-0.68		7.7	0.86
7.24	-0.68		7.73	0.86
7.27	-0.68		7.75	0.85
7.29	-0.67		7.78	0.86
7.32	-0.65		7.81	0.86
7.34	-0.63		7.83	0.87
7.37	-0.63		7.86	0.88
7.39	-0.63		7.89	0.91
7.42	-0.62		7.91	0.92
7.44	-0.64		7.94	0.97
7.47	-0.62		7.97	1
7.49	-0.62		7.99	1.03
7.52	-0.62		8.02	1.11
7.54	-0.59		8.05	1.18
7.57	-0.6		8.07	1.29
7.59	-0.58		8.1	1.4
7.62	-0.6		8.13	1.58
7.64	-0.56		8.15	1.82
7.67	-0.57		8.18	2.1
7.69	-0.53		8.21	2.44
7.72	-0.55		8.23	2.88
7.74	-0.53		8.26	3.37
7.77	-0.52		8.29	3.92
7.79	-0.51		8.31	4.48
7.82	-0.49		8.34	5.13
7.84	-0.48		8.37	5.76
7.87	-0.44		8.39	6.4
7.89	-0.42		8.42	7.04
7.92	-0.4		8.45	7.72
7.94	-0.39		8.47	8.31
7.97	-0.34		8.5	8.93
7.99	-0.31		8.53	9.44
8.02	-0.25		8.55	9.92
8.04	-0.19		8.58	10.32
8.07	-0.13		8.61	10.6
8.09	0		8.63	10.81
8.12	0.11		8.66	10.9
8.14	0.22		8.69	10.92
8.17	0.39		8.71	10.9
8.19	0.57		8.74	10.86
8.22	0.77		8.77	10.75
8.24	0.95		8.79	10.63
8.27	1.15		8.82	10.52
8.29	1.34		8.85	10.37
8.32	1.54		8.87	10.22
8.34	1.73		8.9	10.08
8.37	1.91		8.93	9.88
8.39	2.05		8.95	9.74
8.42	2.21		8.98	9.52
8.44	2.35		9.01	9.39
8.47	2.46		9.03	9.22
8.49	2.59		9.06	9.09
8.52	2.69		9.09	8.9
8.54	2.78		9.11	8.79
8.57	2.81		9.14	8.68
8.59	2.85		9.17	8.59
8.62	2.84		9.19	8.52
8.64	2.87		9.22	8.43
8.67	2.82		9.25	8.4
8.69	2.78		9.27	8.36
8.72	2.72		9.3	8.33
8.74	2.66		9.33	8.31
8.77	2.62		9.35	8.29
8.79	2.52		9.38	8.28
8.82	2.47		9.41	8.28
8.84	2.42		9.43	8.28
8.87	2.33		9.46	8.3
8.89	2.25		9.49	8.32
8.92	2.2		9.51	8.32
8.94	2.14		9.54	8.34
8.97	2.09		9.57	8.34
8.99	2.06		9.59	8.39
9.02	1.98		9.62	8.41
9.04	1.96		9.65	8.4
9.07	1.88		9.67	8.42
9.09	1.86		9.7	8.43
9.12	1.82		9.73	8.46
9.14	1.77		9.75	8.46
9.17	1.76		9.78	8.48
9.19	1.7		9.81	8.48
9.22	1.7		9.83	8.45
9.24	1.67		9.86	8.47
9.27	1.66		9.89	8.46
9.29	1.67		9.91	8.44
9.32	1.64		9.94	8.45
9.34	1.62		9.97	8.43
9.37	1.61		9.99	8.44
9.39	1.62		10.02	8.41
9.42	1.59		10.05	8.43
9.44	1.61		10.07	8.42
9.47	1.57		10.1	8.4
9.49	1.62		10.13	8.41
9.52	1.56		10.15	8.4
9.54	1.61		10.18	8.4
9.57	1.6		10.21	8.41
9.59	1.58		10.23	8.42
9.62	1.59		10.26	8.43
9.64	1.62		10.29	8.47
9.67	1.61		10.31	8.47
9.69	1.6		10.34	8.5
9.72	1.61		10.37	8.52
9.74	1.61		10.39	8.55
9.77	1.62		10.42	8.58
9.79	1.63		10.45	8.65
9.82	1.64		10.47	8.69
9.84	1.66		10.5	8.73
9.87	1.64		10.53	8.79
9.89	1.63		10.55	8.84
9.92	1.68		10.58	8.88
9.94	1.65		10.61	8.98
9.97	1.68		10.63	9.06
9.99	1.68		10.66	9.13
10.02	1.71		10.69	9.19
10.04	1.73		10.71	9.28
10.07	1.72		10.74	9.38
10.09	1.73		10.77	9.46
10.12	1.75		10.79	9.55
10.14	1.76		10.82	9.68
10.17	1.8		10.85	9.76
10.19	1.81		10.87	9.91
10.22	1.82		10.9	9.99
10.24	1.85		10.93	10.13
10.27	1.83		10.95	10.26
10.29	1.88		10.98	10.38
10.32	1.87		11.01	10.52
10.34	1.88		11.03	10.66
10.37	1.89		11.06	10.8
10.39	1.9		11.09	10.96
10.42	1.93		11.11	11.11
10.44	1.96		11.14	11.26
10.47	1.95		11.17	11.42
10.49	1.95		11.19	11.58
10.52	2		11.22	11.8
10.54	2		11.25	11.93
10.57	2.02		11.27	12.12
10.59	2.03		11.3	12.27
10.62	2.03		11.33	12.44
10.64	2.07		11.35	12.67
10.67	2.1		11.38	12.83
10.69	2.08		11.41	13.03
10.72	2.11		11.43	13.26
10.74	2.15		11.46	13.46
10.77	2.16		11.48	13.64
10.79	2.17		11.51	13.83
10.82	2.19		11.54	14.06
10.84	2.22		11.56	14.28
10.86	2.24		11.59	14.49
10.89	2.28		11.62	14.71
10.91	2.29		11.64	14.94
10.94	2.34		11.67	15.17
10.96	2.34		11.7	15.38
10.99	2.39		11.72	15.64
11.01	2.42		11.75	15.89
11.04	2.44		11.78	16.12
11.06	2.49		11.8	16.36
11.09	2.51		11.83	16.62
11.11	2.56		11.86	16.86
11.14	2.6		11.88	17.09
11.16	2.65		11.91	17.34
11.19	2.68		11.94	17.6
11.21	2.73		11.96	17.85
11.24	2.74		11.99	18.12
11.26	2.8		12.02	18.35
11.29	2.84		12.04	18.63
11.31	2.87		12.07	18.86
11.34	2.9		12.1	19.15
11.36	2.95		12.12	19.42
11.39	3		12.15	19.65
11.41	3.04		12.18	19.93
11.44	3.11		12.2	20.19
11.46	3.15		12.23	20.46
11.49	3.21		12.26	20.7
11.51	3.25		12.28	21
11.54	3.28		12.31	21.25
11.56	3.34		12.34	21.54
11.59	3.38		12.36	21.8
11.61	3.43		12.39	22.06
11.64	3.48		12.42	22.29
11.66	3.54		12.44	22.58
11.69	3.56		12.47	22.83
11.71	3.61		12.5	23.09
11.74	3.66		12.52	23.34
11.76	3.71		12.55	23.56
11.79	3.77		12.58	23.82
11.81	3.79		12.6	24.04
11.84	3.83		12.63	24.27
11.86	3.89		12.66	24.51
11.89	3.96		12.68	24.71
11.91	4		12.71	24.92
11.94	4.06		12.74	25.14
11.96	4.13		12.76	25.35
11.99	4.18		12.79	25.54
12.01	4.22		12.82	25.75
12.04	4.29		12.84	25.93
12.06	4.34		12.87	26.11
12.09	4.39		12.9	26.26
12.11	4.46		12.92	26.42
12.14	4.51		12.95	26.58
12.16	4.57		12.98	26.73
12.19	4.64		13	26.89
12.21	4.68		13.03	27.02
12.24	4.73		13.06	27.17
12.26	4.79		13.08	27.29
12.29	4.84		13.11	27.41
12.31	4.89		13.14	27.54
12.34	4.95		13.16	27.62
12.36	5.02		13.19	27.74
12.39	5.06		13.22	27.84
12.41	5.13		13.24	27.97
12.44	5.17		13.27	28.05
12.46	5.23		13.3	28.13
12.49	5.28		13.32	28.2
12.51	5.35		13.35	28.3
12.54	5.38		13.38	28.4
12.56	5.43		13.4	28.47
12.59	5.49		13.43	28.59
12.61	5.54		13.46	28.71
12.64	5.58		13.48	28.8
12.66	5.61		13.51	28.95
12.69	5.67		13.54	29.08
12.71	5.72		13.56	29.21
12.74	5.78		13.59	29.4
12.76	5.8		13.62	29.58
12.79	5.84		13.64	29.78
12.81	5.89		13.67	30.01
12.84	5.93		13.7	30.29
12.86	5.98		13.72	30.62
12.89	6.02		13.75	30.91
12.91	6.07		13.78	31.29
12.94	6.11		13.8	31.71
12.96	6.18		13.83	32.14
12.99	6.19		13.86	32.7
13.01	6.22		13.88	33.2
13.04	6.26		13.91	33.79
13.06	6.34		13.94	34.38
13.09	6.35		13.96	35.03
13.11	6.39		13.99	35.7
13.14	6.42		14.02	36.38
13.16	6.45		14.04	37.11
13.19	6.5		14.07	37.86
13.21	6.54		14.1	38.6
13.24	6.57		14.12	39.37
13.26	6.61		14.15	40.08
13.29	6.65		14.18	40.8
13.31	6.68		14.2	41.52
13.34	6.73		14.23	42.15
13.36	6.75		14.26	42.82
13.39	6.79		14.28	43.36
13.41	6.82		14.31	43.9
13.44	6.85		14.34	44.34
13.46	6.87		14.36	44.7
13.49	6.9		14.39	45
13.51	6.91		14.42	45.23
13.54	6.94		14.44	45.39
13.56	6.95		14.47	45.44
13.59	6.96		14.5	45.42
13.61	7.03		14.52	45.29
13.64	7.04		14.55	45.12
13.66	7.03		14.58	44.82
13.69	7.08		14.6	44.45
13.71	7.07		14.63	44.03
13.74	7.1		14.66	43.53
13.76	7.1		14.68	42.94
13.79	7.12		14.71	42.32
13.81	7.13		14.74	41.62
13.84	7.14		14.76	40.89
13.86	7.14		14.79	40.14
13.89	7.15		14.82	39.37
13.91	7.14		14.84	38.52
13.94	7.13		14.87	37.65
13.96	7.13		14.9	36.75
13.99	7.11		14.92	35.86
14.01	7.12		14.95	34.94
14.04	7.07		14.98	34.1
14.06	7.06		15	33.18
14.09	7.03		15.03	32.38
14.11	7.03		15.06	31.43
14.14	6.99		15.08	30.6
14.16	6.93		15.11	29.75
14.19	6.92		15.14	28.93
14.21	6.89		15.16	28.16
14.24	6.84		15.19	27.4
14.26	6.8		15.22	26.66
14.29	6.74		15.24	25.97
14.31	6.7		15.27	25.27
14.34	6.64		15.3	24.66
14.36	6.59		15.32	24.02
14.39	6.54		15.35	23.52
14.41	6.5		15.38	22.92
14.44	6.41		15.4	22.42
14.46	6.32		15.43	21.96
14.49	6.27		15.46	21.52
14.51	6.19		15.48	21.13
14.54	6.14		15.51	20.71
14.56	6.08		15.54	20.4
14.59	5.99		15.56	20.11
14.61	5.94		15.59	19.86
14.64	5.84		15.62	19.6
14.66	5.78		15.64	19.4
14.69	5.69		15.67	19.25
14.71	5.64		15.7	19.12
14.74	5.55		15.72	19.03
14.76	5.47		15.75	18.98
14.79	5.41		15.78	18.93
14.81	5.31		15.8	18.88
14.84	5.28		15.83	18.88
14.86	5.18		15.86	18.81
14.89	5.13		15.88	18.8
14.91	5.05		15.91	18.76
14.94	4.99		15.94	18.75
14.96	4.93		15.96	18.7
14.99	4.87		15.99	18.7
15.01	4.83		16.02	18.68
15.04	4.77		16.04	18.67
15.06	4.7		16.07	18.72
15.09	4.68		16.09	18.75
15.11	4.61		16.12	18.78
15.14	4.6		16.15	18.87
15.16	4.57		16.17	18.96
15.19	4.53		16.2	19.04
15.21	4.52		16.23	19.14
15.24	4.49		16.25	19.27
15.26	4.47		16.28	19.4
15.29	4.46		16.31	19.55
15.31	4.44		16.33	19.71
15.34	4.43		16.36	19.85
15.36	4.46		16.39	20
15.39	4.45		16.41	20.16
15.41	4.47		16.44	20.28
15.44	4.52		16.47	20.42
15.46	4.56		16.49	20.53
15.49	4.61		16.52	20.65
15.51	4.72		16.55	20.74
15.54	4.78		16.57	20.75
15.56	4.92		16.6	20.8
15.59	5.05		16.63	20.79
15.61	5.17		16.65	20.73
15.64	5.37		16.68	20.65
15.66	5.58		16.71	20.7
15.69	5.84		16.73	20.67
15.71	6.15		16.76	20.58
15.74	6.47		16.79	20.44
15.76	6.85		16.81	20.25
15.79	7.31		16.84	19.98
15.81	7.77		16.87	19.7
15.84	8.37		16.89	19.38
15.86	8.99		16.92	19.04
15.89	9.74		16.95	18.65
15.91	10.55		16.97	18.24
15.94	11.4		17	17.75
15.96	12.34		17.03	17.26
15.99	13.3		17.05	16.74
16.01	14.41		17.08	16.24
16.04	15.52		17.11	15.66
16.06	16.72		17.13	15.1
16.09	17.89		17.16	14.54
16.11	19.02		17.19	13.93
16.14	20.16		17.21	13.31
16.16	21.32		17.24	12.73
16.19	22.37		17.27	12.1
16.21	23.34		17.29	11.52
16.24	24.22		17.32	10.88
16.26	24.97		17.35	10.33
16.28	25.71		17.37	9.71
16.31	26.37		17.4	9.14
16.33	27.02		17.43	8.54
16.36	27.59		17.45	8.01
16.38	28.05		17.48	7.47
16.41	28.54		17.51	6.94
16.43	29		17.53	6.42
16.46	29.47		17.56	5.96
16.48	29.87		17.59	5.44
16.51	30.22		17.61	4.98
16.53	30.53		17.64	4.55
16.56	30.79		17.67	4.12
16.58	30.98		17.69	3.76
16.61	31.11		17.72	3.39
16.63	31.22		17.75	3.04
16.66	31.16		17.77	2.71
16.68	31.07		17.8	2.36
16.71	30.84		17.83	2.09
16.73	30.56		17.85	1.81
16.76	30.2		17.88	1.57
16.78	29.73		17.91	1.35
16.81	29.19		17.93	1.15
16.83	28.57		17.96	0.96
16.86	27.88		17.99	0.76
16.88	27.14		18.01	0.63
16.91	26.32		18.04	0.49
16.93	25.45		18.07	0.37
16.96	24.59		18.09	0.27
16.98	23.67		18.12	0.18
17.01	22.75		18.15	0.1
17.03	21.73		18.17	0.02
17.06	20.73		18.2	-0.03
17.08	19.76		18.23	-0.08
17.11	18.76		18.25	-0.12
17.13	17.76		18.28	-0.17
17.16	16.84		18.31	-0.23
17.18	15.84		18.33	-0.25
17.21	14.87		18.36	-0.32
17.23	13.91		18.39	-0.38
17.26	12.97		18.41	-0.44
17.28	12.11		18.44	-0.48
17.31	11.21		18.47	-0.54
17.33	10.33		18.49	-0.61
17.36	9.43		18.52	-0.66
17.38	8.67		18.55	-0.72
17.41	7.86		18.57	-0.8
17.43	7.09		18.6	-0.84
17.46	6.37		18.63	-0.91
17.48	5.61		18.65	-0.98
17.51	4.91		18.68	-1.01
17.53	4.28		18.71	-1.07
17.56	3.7		18.73	-1.1
17.58	3.09		18.76	-1.16
17.61	2.53		18.79	-1.21
17.63	1.94		18.81	-1.27
17.66	1.43		18.84	-1.3
17.68	0.94		18.87	-1.33
17.71	0.5		18.89	-1.35
17.73	0.11		18.92	-1.39
17.76	-0.24		18.95	-1.39
17.78	-0.61		18.97	-1.4
17.81	-0.97		19	-1.4
17.83	-1.3		19.03	-1.35
17.86	-1.61		19.05	-1.32
17.88	-1.85		19.08	-1.26
17.91	-2.09		19.11	-1.15
17.93	-2.3		19.13	-1.09
17.96	-2.51		19.16	-0.97
17.98	-2.69		19.19	-0.85
18.01	-2.87		19.21	-0.67
18.03	-3.01		19.24	-0.54
18.06	-3.16		19.27	-0.31
18.08	-3.26		19.29	-0.13
18.11	-3.37		19.32	0.07
18.13	-3.46		19.35	0.28
18.16	-3.56		19.37	0.45
18.18	-3.63		19.4	0.63
18.21	-3.68		19.43	0.81
18.23	-3.75		19.45	0.95
18.26	-3.83		19.48	1.12
18.28	-3.9
18.31	-3.95
18.33	-3.99
18.36	-4.08
18.38	-4.1
18.41	-4.13
18.43	-4.18
18.46	-4.22
18.48	-4.28
18.51	-4.33
18.53	-4.35
18.56	-4.37
18.58	-4.4
18.61	-4.45
18.63	-4.48
18.66	-4.48
18.68	-4.51
18.71	-4.52
18.73	-4.55
18.76	-4.54
18.78	-4.59
18.81	-4.57
18.83	-4.57
18.86	-4.55
18.88	-4.52
18.91	-4.53
18.93	-4.47
18.96	-4.41
18.98	-4.38
19.01	-4.29
19.03	-4.25
19.06	-4.14
19.08	-4.03
19.11	-3.9
19.13	-3.76
19.16	-3.59
19.18	-3.41
19.21	-3.24
19.23	-3.02
19.26	-2.85
19.28	-2.65
19.31	-2.47
19.33	-2.26
19.36	-2.09
19.38	-1.94
19.41	-1.77
19.43	-1.64
19.46	-1.5
19.48	-1.4
