# Supplementary material for: Structural insights into hormone recognition by the human glucose-dependent insulinotropic polypeptide receptor
Source: eLife journal article supplement (doi:10.7554/elife.68719), 2021-07-13
Supplement: supp [file Figure 1—figure supplement 1D-source data 1.xlsx]

## Sheet: Figure 1—figure supplement 1D
Figure 1—figure supplement 1D-source data 1
				GIP1-42-hGIPR(22-421)-15AA-LgBiT-Gs complex
			GIP1-42-hGIPR(22-421)(T345F)-15AA-LgBiT-Gs complex
