# Supplementary material for: Structural insights into hormone recognition by the human glucose-dependent insulinotropic polypeptide receptor
Source: eLife journal article supplement (doi:10.7554/elife.68719), 2021-07-13
Supplement: supp [file Figure 1—figure supplement 1E-source data 1.xlsx]

## Sheet: Figure 1—figure supplement 1E
Figure 1—figure supplement 1E-source data 1
superose 6 24ml eltue
GIP1-42-hGIPR(22-421)(T345F)-15AA-LgBiT-Gs complex
Volume (mL)	UV 280 (mAU)
0.003232	0
0.011576	0
0.019906	-0.39
0.028109	-0.22
0.036568	-0.12
0.044902	-0.06
0.053125	-0.03
0.069787	-0.01
0.078118	0
0.08645	-0.01
0.094912	-0.01
0.103241	-0.02
0.111444	-0.02
0.119904	-0.02
0.136457	-0.03
0.144788	-0.02
0.153248	-0.02
0.161451	-0.01
0.169782	0
0.178114	0
0.186573	0.01
0.203237	0.03
0.211569	0.02
0.219791	0.02
0.228123	0.02
0.236584	0.02
0.244785	0.01
0.253116	0.01
0.269909	0.01
0.278239	0.01
0.28657	0.01
0.294904	0.01
0.303129	0
0.311461	0
0.319792	0
0.336455	-0.01
0.344786	-0.02
0.353248	-0.04
0.361447	-0.03
0.36978	-0.04
0.378239	-0.04
0.386462	-0.04
0.403124	-0.05
0.411455	-0.05
0.419787	-0.06
0.428119	-0.06
0.43658	-0.06
0.444781	-0.06
0.453112	-0.07
0.469791	-0.08
0.478122	-0.08
0.486454	-0.08
0.494916	-0.08
0.503116	-0.08
0.511469	-0.09
0.5198	-0.08
0.536566	-0.08
0.544902	-0.08
0.553271	-0.1
0.561565	-0.09
0.569903	-0.1
0.578271	-0.09
0.586567	-0.09
0.594902	-0.11
0.603237	-0.11
0.611565	-0.1
0.619903	-0.11
0.636607	-0.14
0.644903	-0.13
0.653237	-0.13
0.661565	-0.13
0.669903	-0.13
0.678245	-0.14
0.686573	-0.14
0.694936	-0.15
0.703238	-0.15
0.711573	-0.16
0.719901	-0.16
0.736682	-0.16
0.744901	-0.17
0.753246	-0.17
0.761572	-0.17
0.769908	-0.18
0.778269	-0.18
0.786572	-0.17
0.794901	-0.18
0.803238	-0.18
0.811581	-0.18
0.819908	-0.19
0.828244	-0.2
0.836607	-0.19
0.844908	-0.2
0.853236	-0.2
0.861572	-0.2
0.869908	-0.2
0.878244	-0.2
0.886573	-0.19
0.894949	-0.2
0.903252	-0.2
0.911573	-0.2
0.919941	-0.21
0.928235	-0.21
0.944907	-0.22
0.953251	-0.21
0.961572	-0.22
0.969907	-0.22
0.978268	-0.23
0.986571	-0.23
0.994908	-0.23
1.00324	-0.23
1.01157	-0.23
1.01991	-0.23
1.02823	-0.24
1.0366	-0.23
1.05324	-0.24
1.06157	-0.24
1.06991	-0.25
1.07824	-0.24
1.08657	-0.25
1.09491	-0.25
1.10324	-0.25
1.11157	-0.25
1.11994	-0.26
1.12824	-0.25
1.13657	-0.25
1.14491	-0.25
1.16158	-0.25
1.17828	-0.25
1.18658	-0.24
1.19491	-0.25
1.20324	-0.26
1.21158	-0.26
1.21991	-0.25
1.22824	-0.25
1.23661	-0.27
1.24491	-0.27
1.25324	-0.27
1.26991	-0.26
1.27824	-0.26
1.28658	-0.26
1.29491	-0.26
1.30324	-0.27
1.31158	-0.28
1.31995	-0.28
1.32824	-0.28
1.33658	-0.28
1.34491	-0.28
1.35321	-0.28
1.36988	-0.27
1.37821	-0.28
1.38658	-0.28
1.39488	-0.29
1.40321	-0.28
1.41173	-0.28
1.41988	-0.28
1.42821	-0.28
1.43654	-0.29
1.44488	-0.3
1.45321	-0.3
1.46991	-0.3
1.47821	-0.3
1.48655	-0.31
1.49488	-0.31
1.50321	-0.32
1.51154	-0.32
1.51988	-0.32
1.52824	-0.32
1.53654	-0.34
1.54488	-0.33
1.55321	-0.33
1.56155	-0.33
1.57829	-0.33
1.58655	-0.32
1.59488	-0.33
1.60321	-0.34
1.61158	-0.34
1.61988	-0.34
1.6282	-0.34
1.63655	-0.33
1.64488	-0.33
1.65322	-0.34
1.66154	-0.34
1.66991	-0.34
1.68655	-0.33
1.69488	-0.33
1.70321	-0.33
1.71155	-0.33
1.71989	-0.32
1.72825	-0.32
1.73655	-0.33
1.74489	-0.32
1.75325	-0.33
1.76155	-0.33
1.76988	-0.33
1.78655	-0.32
1.79488	-0.33
1.80321	-0.33
1.81158	-0.32
1.81988	-0.32
1.82821	-0.33
1.83655	-0.33
1.84488	-0.34
1.85321	-0.34
1.86155	-0.35
1.86992	-0.34
1.88655	-0.34
1.89488	-0.35
1.90321	-0.34
1.91155	-0.35
1.91989	-0.34
1.92821	-0.34
1.93655	-0.34
1.94488	-0.35
1.95325	-0.35
1.96155	-0.35
1.96989	-0.35
1.98655	-0.35
1.99488	-0.35
2.00321	-0.35
2.01158	-0.35
2.01988	-0.34
2.02821	-0.34
2.03655	-0.36
2.04488	-0.37
2.05322	-0.36
2.06155	-0.36
2.06992	-0.36
2.07822	-0.36
2.09492	-0.36
2.10322	-0.37
2.11155	-0.37
2.11988	-0.36
2.12822	-0.36
2.13655	-0.36
2.14488	-0.36
2.15325	-0.36
2.16155	-0.36
2.16988	-0.36
2.17822	-0.37
2.18655	-0.36
2.19488	-0.36
2.20322	-0.37
2.21158	-0.37
2.21989	-0.37
2.22822	-0.36
2.23655	-0.36
2.24488	-0.36
2.25333	-0.36
2.26155	-0.36
2.26988	-0.35
2.27822	-0.35
2.28655	-0.35
2.30322	-0.35
2.31155	-0.36
2.31988	-0.35
2.32822	-0.36
2.33655	-0.36
2.34489	-0.36
2.35325	-0.36
2.36155	-0.36
2.36989	-0.36
2.37822	-0.37
2.38655	-0.36
2.39489	-0.36
2.41159	-0.35
2.41991	-0.35
2.42822	-0.35
2.43659	-0.35
2.44489	-0.36
2.45322	-0.35
2.46155	-0.35
2.46989	-0.36
2.47822	-0.35
2.48655	-0.37
2.49492	-0.36
2.51155	-0.36
2.5199	-0.36
2.52822	-0.38
2.53656	-0.37
2.54489	-0.36
2.55326	-0.36
2.56155	-0.36
2.56989	-0.36
2.57823	-0.36
2.58655	-0.37
2.60322	-0.36
2.61155	-0.36
2.61989	-0.35
2.62822	-0.35
2.63659	-0.35
2.64489	-0.35
2.65322	-0.36
2.66156	-0.36
2.66989	-0.37
2.67822	-0.37
2.68655	-0.37
2.69493	-0.36
2.70322	-0.35
2.71156	-0.35
2.71989	-0.35
2.72822	-0.35
2.73656	-0.36
2.74489	-0.36
2.75319	-0.36
2.76152	-0.36
2.76985	-0.36
2.77819	-0.35
2.79486	-0.36
2.80319	-0.35
2.81153	-0.36
2.81985	-0.36
2.82819	-0.35
2.83652	-0.35
2.84489	-0.35
2.85319	-0.35
2.86153	-0.35
2.86985	-0.35
2.87819	-0.34
2.88652	-0.35
2.90322	-0.35
2.91152	-0.36
2.91985	-0.36
2.92837	-0.35
2.93652	-0.35
2.94485	-0.35
2.9532	-0.35
2.96152	-0.36
2.96986	-0.35
2.97819	-0.36
2.98657	-0.35
3.00319	-0.35
3.01152	-0.35
3.01986	-0.36
3.02819	-0.35
3.03653	-0.36
3.04489	-0.36
3.0532	-0.34
3.06152	-0.35
3.06986	-0.34
3.0782	-0.35
3.08652	-0.35
3.10319	-0.35
3.11153	-0.35
3.11986	-0.35
3.12822	-0.34
3.13652	-0.34
3.14486	-0.34
3.15319	-0.35
3.16152	-0.34
3.16986	-0.34
3.17819	-0.35
3.18655	-0.34
3.20319	-0.34
3.21152	-0.33
3.21987	-0.34
3.22819	-0.34
3.23653	-0.34
3.24489	-0.33
3.25319	-0.34
3.26153	-0.34
3.26989	-0.34
3.27819	-0.34
3.28653	-0.33
3.3032	-0.33
3.31153	-0.33
3.31987	-0.33
3.32823	-0.34
3.33653	-0.34
3.34486	-0.34
3.35319	-0.33
3.36153	-0.34
3.36987	-0.34
3.37819	-0.35
3.38656	-0.34
3.39486	-0.34
3.40319	-0.34
3.41986	-0.34
3.42819	-0.35
3.43653	-0.34
3.44487	-0.34
3.45319	-0.33
3.46153	-0.33
3.4699	-0.33
3.47819	-0.33
3.48653	-0.33
3.49486	-0.33
3.50319	-0.34
3.51986	-0.33
3.52823	-0.33
3.53653	-0.33
3.54486	-0.32
3.5532	-0.32
3.56153	-0.33
3.56986	-0.32
3.57819	-0.32
3.58657	-0.32
3.59487	-0.33
3.6032	-0.33
3.61156	-0.33
3.61986	-0.32
3.6282	-0.33
3.63653	-0.33
3.64486	-0.32
3.6532	-0.32
3.66153	-0.31
3.6699	-0.31
3.6782	-0.31
3.68653	-0.31
3.69486	-0.31
3.7032	-0.3
3.71154	-0.3
3.71986	-0.3
3.72823	-0.3
3.73653	-0.3
3.74486	-0.29
3.7532	-0.29
3.76153	-0.29
3.76998	-0.29
3.7782	-0.3
3.78653	-0.3
3.79486	-0.3
3.81156	-0.3
3.81986	-0.31
3.8282	-0.3
3.83654	-0.31
3.84487	-0.31
3.8532	-0.31
3.86153	-0.31
3.8699	-0.3
3.8782	-0.3
3.88653	-0.29
3.89487	-0.29
3.91153	-0.29
3.91986	-0.28
3.92823	-0.28
3.93654	-0.29
3.94487	-0.29
3.95323	-0.29
3.96154	-0.28
3.96987	-0.27
3.9782	-0.29
3.98653	-0.28
4.0032	-0.29
4.01157	-0.29
4.01987	-0.29
4.0282	-0.29
4.03653	-0.28
4.04486	-0.3
4.0532	-0.28
4.06153	-0.29
4.06989	-0.29
4.07821	-0.27
4.08653	-0.27
4.1032	-0.27
4.11154	-0.26
4.11987	-0.26
4.12821	-0.27
4.13653	-0.28
4.14488	-0.28
4.15323	-0.28
4.16154	-0.28
4.16983	-0.28
4.17817	-0.28
4.1865	-0.28
4.20318	-0.28
4.2115	-0.27
4.21987	-0.27
4.22817	-0.27
4.2365	-0.27
4.24484	-0.28
4.25317	-0.27
4.26151	-0.27
4.26983	-0.28
4.27817	-0.27
4.28651	-0.27
4.3032	-0.27
4.31151	-0.27
4.31984	-0.27
4.32817	-0.26
4.3365	-0.26
4.34483	-0.26
4.35317	-0.26
4.36154	-0.26
4.36983	-0.26
4.37817	-0.26
4.3865	-0.27
4.39483	-0.26
4.41151	-0.26
4.41987	-0.26
4.42817	-0.26
4.43651	-0.25
4.44502	-0.26
4.45317	-0.26
4.4615	-0.25
4.46984	-0.25
4.47818	-0.24
4.48651	-0.25
4.49483	-0.25
4.51151	-0.26
4.51984	-0.25
4.52817	-0.24
4.53651	-0.24
4.54484	-0.25
4.55317	-0.24
4.56154	-0.24
4.56983	-0.24
4.57817	-0.24
4.5865	-0.24
4.59484	-0.24
4.61159	-0.24
4.61984	-0.24
4.62817	-0.23
4.6365	-0.23
4.64487	-0.23
4.65318	-0.23
4.66151	-0.23
4.66984	-0.23
4.67818	-0.23
4.6865	-0.23
4.69484	-0.22
4.70321	-0.21
4.71984	-0.21
4.72818	-0.21
4.73651	-0.22
4.74484	-0.22
4.75317	-0.22
4.76154	-0.22
4.76984	-0.22
4.77817	-0.22
4.78654	-0.22
4.79484	-0.21
4.80317	-0.22
4.81984	-0.21
4.82818	-0.21
4.83651	-0.22
4.84487	-0.21
4.85318	-0.21
4.86151	-0.2
4.86985	-0.2
4.87817	-0.2
4.88651	-0.2
4.89484	-0.2
4.90321	-0.2
4.91985	-0.2
4.92817	-0.2
4.93651	-0.2
4.94484	-0.2
4.95317	-0.19
4.96151	-0.19
4.96985	-0.18
4.97818	-0.18
4.98654	-0.19
4.99484	-0.18
5.00317	-0.18
5.01151	-0.17
5.01984	-0.17
5.02818	-0.17
5.03652	-0.17
5.04487	-0.18
5.05317	-0.18
5.06151	-0.18
5.06985	-0.18
5.08091	-0.17
5.08661	-0.17
5.09484	-0.16
5.10324	-0.16
5.11984	-0.16
5.12821	-0.16
5.13651	-0.15
5.14484	-0.16
5.15318	-0.16
5.16151	-0.16
5.16984	-0.16
5.17818	-0.15
5.18654	-0.16
5.19484	-0.15
5.20318	-0.16
5.21985	-0.15
5.22817	-0.15
5.23651	-0.15
5.24488	-0.15
5.25317	-0.14
5.26151	-0.14
5.26984	-0.14
5.27818	-0.14
5.28662	-0.14
5.29484	-0.14
5.31151	-0.14
5.31985	-0.14
5.32821	-0.13
5.33651	-0.14
5.34485	-0.14
5.35318	-0.14
5.36151	-0.14
5.36984	-0.14
5.37818	-0.14
5.38655	-0.13
5.39484	-0.11
5.41151	-0.13
5.41984	-0.11
5.42819	-0.11
5.43651	-0.12
5.44488	-0.11
5.4532	-0.12
5.46151	-0.11
5.46988	-0.11
5.48651	-0.11
5.49484	-0.11
5.50318	-0.11
5.51151	-0.11
5.51985	-0.11
5.52821	-0.11
5.53651	-0.1
5.54485	-0.11
5.55315	-0.09
5.56148	-0.1
5.56982	-0.1
5.58648	-0.1
5.59484	-0.08
5.60314	-0.09
5.61148	-0.09
5.61982	-0.09
5.62814	-0.09
5.63648	-0.1
5.64481	-0.09
5.65315	-0.09
5.66981	-0.08
5.67818	-0.07
5.68648	-0.07
5.69482	-0.06
5.70315	-0.08
5.71149	-0.08
5.71981	-0.08
5.72815	-0.08
5.73651	-0.08
5.74482	-0.08
5.75315	-0.07
5.76148	-0.07
5.77815	-0.06
5.78648	-0.06
5.79481	-0.07
5.80315	-0.07
5.81148	-0.06
5.81986	-0.05
5.82815	-0.05
5.83648	-0.05
5.84482	-0.04
5.85315	-0.03
5.86149	-0.03
5.86982	-0.03
5.87819	-0.04
5.88649	-0.05
5.89482	-0.04
5.90315	-0.05
5.91149	-0.05
5.91981	-0.05
5.92815	-0.03
5.93652	-0.04
5.94482	-0.05
5.95315	-0.04
5.96166	-0.04
5.96981	-0.03
5.98649	-0.05
5.99481	-0.04
6.00315	-0.04
6.01149	-0.04
6.01985	-0.04
6.03081	-0.05
6.03649	-0.04
6.04481	-0.04
6.05315	-0.04
6.06148	-0.04
6.06981	-0.03
6.07818	-0.04
6.09482	-0.03
6.10315	-0.03
6.11149	-0.02
6.11982	-0.02
6.12823	-0.02
6.13648	-0.01
6.14482	-0.01
6.15315	-0.01
6.16152	-0.02
6.16982	-0.02
6.17815	-0.02
6.18649	-0.01
6.20315	0
6.21148	-0.01
6.21985	0
6.22816	-0.01
6.23648	-0.01
6.24482	-0.01
6.25316	0
6.26149	0.01
6.26982	0.01
6.27818	0.01
6.28648	0
6.30319	0.01
6.31148	0.02
6.31982	0.02
6.32816	0.01
6.33648	0.01
6.34482	0.02
6.35316	0.02
6.36152	0.01
6.36982	0.02
6.37815	0.02
6.38649	0.02
6.39482	0.02
6.40315	0.02
6.41985	0.02
6.42816	0.02
6.43648	0.02
6.44482	0.03
6.45316	0.03
6.46149	0.03
6.46983	0.03
6.47816	0.03
6.48649	0.04
6.49482	0.04
6.50319	0.04
6.51149	0.03
6.51982	0.03
6.52815	0.04
6.53649	0.04
6.54482	0.03
6.55316	0.04
6.56152	0.03
6.56982	0.03
6.57815	0.05
6.58649	0.05
6.59482	0.06
6.60316	0.06
6.61149	0.06
6.61986	0.06
6.62815	0.05
6.63649	0.05
6.64485	0.06
6.65315	0.06
6.6615	0.07
6.66983	0.07
6.67816	0.07
6.68649	0.08
6.69483	0.08
6.71149	0.08
6.71983	0.09
6.72816	0.08
6.73649	0.08
6.74483	0.08
6.75315	0.09
6.76152	0.09
6.76982	0.1
6.77816	0.1
6.78649	0.11
6.80327	0.1
6.81149	0.1
6.81982	0.1
6.82816	0.11
6.8365	0.1
6.84486	0.1
6.85315	0.1
6.8615	0.11
6.86982	0.11
6.87816	0.11
6.8865	0.1
6.90319	0.11
6.9115	0.11
6.91983	0.11
6.92816	0.11
6.93649	0.11
6.94482	0.11
6.95313	0.13
6.96145	0.13
6.96984	0.13
6.97813	0.13
6.98646	0.13
7.00312	0.14
7.01147	0.14
7.01979	0.14
7.02813	0.14
7.03646	0.13
7.04479	0.14
7.05316	0.14
7.06145	0.15
7.06979	0.15
7.07813	0.15
7.08645	0.15
7.10313	0.16
7.11149	0.16
7.1198	0.17
7.12812	0.17
7.13646	0.16
7.14479	0.16
7.15313	0.16
7.16146	0.15
7.1698	0.16
7.17812	0.16
7.18647	0.17
7.19483	0.18
7.21146	0.18
7.2198	0.18
7.22812	0.17
7.23646	0.18
7.2448	0.18
7.25316	0.18
7.26146	0.17
7.2698	0.18
7.27813	0.18
7.28646	0.19
7.2948	0.2
7.31146	0.19
7.3198	0.2
7.32813	0.2
7.33649	0.2
7.3448	0.2
7.35313	0.19
7.36146	0.19
7.3698	0.21
7.37812	0.21
7.38647	0.2
7.39483	0.21
7.41146	0.23
7.4198	0.22
7.42813	0.22
7.43646	0.22
7.4448	0.23
7.45316	0.23
7.46147	0.23
7.4698	0.23
7.47831	0.23
7.48646	0.24
7.4948	0.23
7.50313	0.25
7.51147	0.25
7.52813	0.25
7.53649	0.25
7.54479	0.25
7.55313	0.26
7.56146	0.25
7.5698	0.26
7.57813	0.27
7.58647	0.27
7.59483	0.27
7.60313	0.26
7.61146	0.26
7.6198	0.27
7.62813	0.28
7.64489	0.29
7.65313	0.29
7.66147	0.3
7.66979	0.3
7.67816	0.31
7.68647	0.3
7.6948	0.31
7.70313	0.33
7.71146	0.33
7.7198	0.33
7.72813	0.34
7.7448	0.36
7.75313	0.37
7.76147	0.38
7.7698	0.38
7.77814	0.39
7.78647	0.39
7.79484	0.39
7.80314	0.42
7.81147	0.44
7.81983	0.44
7.82813	0.45
7.8448	0.47
7.85314	0.47
7.86146	0.48
7.8698	0.5
7.87817	0.53
7.88647	0.55
7.89481	0.56
7.90313	0.57
7.91147	0.59
7.9198	0.6
7.92814	0.61
7.9448	0.65
7.95314	0.68
7.96146	0.71
7.9698	0.74
7.97813	0.76
7.98647	0.77
7.9948	0.79
8.00314	0.82
8.01147	0.85
8.01984	0.88
8.02814	0.91
8.0448	0.98
8.05313	1.01
8.06146	1.04
8.0698	1.08
8.07817	1.12
8.08647	1.17
8.0948	1.22
8.10313	1.28
8.11147	1.33
8.1198	1.38
8.12814	1.44
8.1365	1.49
8.14481	1.56
8.15314	1.63
8.1615	1.71
8.1698	1.78
8.17813	1.86
8.18647	1.95
8.19481	2.04
8.20313	2.13
8.21147	2.25
8.21983	2.36
8.22813	2.5
8.2448	2.78
8.25314	2.95
8.26147	3.12
8.2698	3.32
8.27817	3.53
8.28647	3.77
8.29481	4.01
8.30314	4.26
8.31147	4.54
8.31992	4.83
8.32814	5.14
8.33647	5.47
8.35311	6.18
8.36144	6.58
8.36981	6.98
8.3781	7.41
8.38644	7.85
8.39477	8.3
8.40311	8.78
8.41144	9.27
8.41978	9.78
8.42814	10.28
8.44477	11.32
8.45311	11.85
8.46144	12.38
8.46977	12.9
8.47811	13.44
8.48649	13.97
8.49477	14.48
8.50311	15
8.51147	15.51
8.51977	16.03
8.52811	16.53
8.53643	17.02
8.55311	17.98
8.56144	18.43
8.5698	18.88
8.57811	19.3
8.58643	19.71
8.59478	20.11
8.60311	20.48
8.61144	20.83
8.61977	21.16
8.62814	21.48
8.63644	21.79
8.64477	22.07
8.66143	22.59
8.66977	22.81
8.67811	23.03
8.68644	23.21
8.69478	23.37
8.70311	23.51
8.71148	23.62
8.71977	23.72
8.72811	23.8
8.73644	23.84
8.74478	23.86
8.76145	23.83
8.76981	23.78
8.77811	23.72
8.78644	23.64
8.79478	23.56
8.8031	23.44
8.81144	23.3
8.81978	23.16
8.8281	23.01
8.83644	22.85
8.84478	22.69
8.86144	22.3
8.86978	22.1
8.87811	21.89
8.88644	21.67
8.89478	21.45
8.90311	21.23
8.91147	21
8.91978	20.78
8.92811	20.55
8.93644	20.32
8.94478	20.1
8.96144	19.67
8.96981	19.45
8.9781	19.23
8.98645	19.01
8.99496	18.8
9.00311	18.58
9.01144	18.36
9.01979	18.16
9.02811	17.96
9.03645	17.76
9.04477	17.56
9.06144	17.2
9.06977	17.02
9.07811	16.85
9.08644	16.68
9.09478	16.51
9.10311	16.36
9.11148	16.2
9.11978	16.05
9.12811	15.9
9.13645	15.76
9.14477	15.62
9.16152	15.36
9.16978	15.24
9.17811	15.12
9.18645	15
9.19481	14.9
9.20311	14.81
9.21145	14.7
9.21978	14.61
9.22811	14.53
9.23645	14.44
9.24478	14.35
9.25315	14.27
9.26145	14.2
9.26978	14.14
9.27811	14.07
9.28645	14
9.29478	13.95
9.30311	13.88
9.31148	13.84
9.31977	13.79
9.32809	13.76
9.33648	13.71
9.34478	13.68
9.35311	13.64
9.36145	13.61
9.36978	13.57
9.37812	13.54
9.38645	13.51
9.39481	13.49
9.40312	13.47
9.41145	13.45
9.41978	13.43
9.42811	13.41
9.43645	13.39
9.45314	13.35
9.46145	13.34
9.46978	13.32
9.47812	13.32
9.48645	13.31
9.49478	13.29
9.50312	13.29
9.51145	13.27
9.51978	13.26
9.52812	13.26
9.53648	13.25
9.55312	13.23
9.56145	13.24
9.56978	13.24
9.57812	13.24
9.58644	13.24
9.59481	13.23
9.60312	13.23
9.61145	13.24
9.61978	13.23
9.62811	13.24
9.63645	13.25
9.65315	13.25
9.66145	13.26
9.66978	13.26
9.67815	13.26
9.68644	13.26
9.69478	13.27
9.70312	13.29
9.71145	13.3
9.71978	13.31
9.72812	13.32
9.73648	13.32
9.74478	13.32
9.76142	13.34
9.76975	13.34
9.77809	13.36
9.78642	13.37
9.79475	13.37
9.80312	13.39
9.81142	13.4
9.81975	13.41
9.82809	13.42
9.83657	13.43
9.84475	13.44
9.85308	13.45
9.86975	13.47
9.87808	13.48
9.88646	13.49
9.89475	13.51
9.90308	13.52
9.91142	13.53
9.91975	13.55
9.92809	13.56
9.93642	13.57
9.94478	13.59
9.96142	13.63
9.96975	13.64
9.97809	13.66
9.98642	13.68
10.0031	13.71
10.0114	13.71
10.0197	13.73
10.0281	13.76
10.0364	13.76
10.0448	13.78
10.0531	13.8
10.0615	13.82
10.0698	13.85
10.0781	13.87
10.0947	13.92
10.1031	13.93
10.1197	13.97
10.1281	13.98
10.1364	14
10.1531	14.04
10.1614	14.06
10.1698	14.08
10.1781	14.1
10.1864	14.12
10.1948	14.15
10.2031	14.17
10.2114	14.19
10.2198	14.22
10.2281	14.25
10.2364	14.28
10.2447	14.29
10.2614	14.34
10.2698	14.37
10.2781	14.39
10.2865	14.42
10.2948	14.44
10.3031	14.47
10.3114	14.49
10.3198	14.52
10.3281	14.55
10.3364	14.58
10.3447	14.62
10.3531	14.64
10.3698	14.7
10.3781	14.74
10.3864	14.76
10.3948	14.8
10.4031	14.84
10.4114	14.86
10.4198	14.9
10.4281	14.94
10.4364	14.96
10.4448	14.99
10.4531	15.03
10.4698	15.1
10.4781	15.13
10.4865	15.17
10.4948	15.2
10.5031	15.24
10.5116	15.27
10.5198	15.31
10.5281	15.35
10.5364	15.38
10.5448	15.41
10.5531	15.45
10.5698	15.53
10.5781	15.57
10.5864	15.61
10.5948	15.64
10.6031	15.68
10.6114	15.72
10.6197	15.77
10.6281	15.81
10.6448	15.88
10.6531	15.92
10.6614	15.97
10.6698	16
10.6864	16.1
10.6948	16.14
10.7031	16.19
10.7115	16.24
10.7198	16.29
10.7281	16.35
10.7364	16.39
10.7448	16.43
10.7531	16.48
10.7614	16.52
10.7698	16.56
10.7864	16.67
10.7948	16.72
10.8031	16.77
10.8114	16.83
10.8198	16.88
10.8281	16.94
10.8364	16.99
10.8447	17.04
10.8531	17.09
10.8698	17.2
10.8781	17.25
10.8864	17.3
10.8948	17.36
10.9031	17.43
10.9115	17.48
10.9198	17.53
10.9281	17.59
10.9364	17.65
10.9448	17.71
10.9531	17.77
10.9614	17.83
10.9698	17.9
10.9781	17.96
10.9864	18.03
10.9948	18.09
11.0031	18.15
11.0198	18.28
11.0281	18.34
11.0364	18.41
11.0448	18.48
11.0531	18.54
11.0614	18.6
11.0698	18.67
11.0781	18.74
11.0864	18.82
11.0948	18.88
11.1031	18.96
11.1198	19.1
11.1281	19.17
11.1364	19.25
11.1447	19.32
11.1531	19.39
11.1614	19.45
11.1697	19.53
11.1781	19.6
11.1864	19.68
11.1947	19.75
11.2114	19.9
11.2197	19.98
11.2281	20.07
11.2379	20.14
11.2447	20.22
11.2531	20.3
11.2614	20.38
11.2697	20.46
11.2781	20.54
11.2864	20.61
11.2947	20.69
11.3114	20.85
11.3198	20.94
11.3281	21.02
11.3364	21.11
11.3447	21.2
11.3532	21.29
11.3614	21.38
11.3697	21.46
11.3781	21.54
11.3864	21.63
11.3947	21.72
11.4114	21.88
11.4197	21.96
11.4281	22.05
11.4364	22.15
11.4447	22.24
11.4531	22.33
11.4614	22.43
11.4697	22.52
11.4781	22.61
11.4864	22.71
11.4947	22.81
11.5031	22.9
11.5198	23.09
11.5364	23.26
11.5448	23.35
11.5531	23.46
11.5614	23.55
11.5697	23.66
11.5781	23.75
11.5864	23.86
11.5947	23.97
11.6031	24.06
11.6197	24.26
11.6281	24.36
11.6364	24.48
11.6447	24.57
11.6531	24.67
11.6614	24.77
11.6697	24.87
11.6781	24.97
11.6864	25.07
11.6947	25.17
11.7031	25.29
11.7197	25.5
11.7281	25.61
11.7364	25.7
11.7448	25.8
11.7531	25.92
11.7614	26.02
11.7697	26.13
11.7781	26.23
11.7864	26.33
11.7947	26.45
11.8031	26.55
11.8197	26.78
11.8281	26.89
11.8377	27
11.8447	27.11
11.8531	27.22
11.8614	27.33
11.8697	27.44
11.8781	27.56
11.8864	27.67
11.8947	27.78
11.9031	27.88
11.9197	28.11
11.9281	28.22
11.9364	28.34
11.9448	28.45
11.9531	28.57
11.9614	28.67
11.9697	28.79
11.9781	28.91
11.9864	29.03
11.9947	29.14
12.0031	29.26
12.0114	29.38
12.0282	29.61
12.0364	29.72
12.0447	29.83
12.0531	29.94
12.0614	30.06
12.0697	30.17
12.0781	30.29
12.0864	30.41
12.0947	30.53
12.1031	30.65
12.1114	30.76
12.1197	30.87
12.1281	31
12.1364	31.12
12.1448	31.24
12.1531	31.35
12.1614	31.46
12.1697	31.59
12.1781	31.69
12.1864	31.8
12.1948	31.92
12.2031	32.04
12.2197	32.27
12.2281	32.39
12.2364	32.51
12.2447	32.62
12.2531	32.74
12.2614	32.86
12.2697	32.97
12.2781	33.08
12.2864	33.2
12.2947	33.32
12.3114	33.56
12.3197	33.67
12.3281	33.79
12.3364	33.91
12.3448	34.03
12.3531	34.14
12.3614	34.26
12.3698	34.38
12.3781	34.5
12.3864	34.62
12.4031	34.85
12.4114	34.97
12.4197	35.07
12.4281	35.17
12.4364	35.28
12.4532	35.52
12.4614	35.63
12.4697	35.74
12.4781	35.85
12.4864	35.96
12.4947	36.08
12.5031	36.19
12.5114	36.29
12.5197	36.41
12.528	36.52
12.5364	36.62
12.5447	36.74
12.5531	36.84
12.5614	36.95
12.5697	37.06
12.5781	37.16
12.5864	37.28
12.5947	37.39
12.603	37.5
12.6114	37.62
12.6197	37.73
12.6364	37.94
12.6447	38.04
12.653	38.14
12.6614	38.25
12.6697	38.36
12.6781	38.46
12.6864	38.56
12.6948	38.65
12.703	38.75
12.7114	38.86
12.7197	38.95
12.728	39.05
12.7447	39.26
12.753	39.37
12.7614	39.48
12.7697	39.57
12.7781	39.67
12.7864	39.75
12.7947	39.85
12.8085	39.95
12.8197	40.12
12.828	40.21
12.8364	40.31
12.8447	40.41
12.853	40.51
12.8614	40.59
12.8699	40.69
12.878	40.78
12.8864	40.86
12.8947	40.96
12.9031	41.05
12.9197	41.21
12.9281	41.3
12.9364	41.38
12.9447	41.47
12.953	41.55
12.9614	41.63
12.9697	41.71
12.9781	41.8
12.9864	41.88
12.9947	41.96
13.003	42.02
13.0197	42.18
13.028	42.25
13.0364	42.33
13.0447	42.4
13.053	42.48
13.0614	42.55
13.0697	42.61
13.078	42.68
13.0864	42.74
13.0947	42.81
13.1114	42.95
13.1197	43.01
13.128	43.08
13.1364	43.15
13.1447	43.21
13.153	43.27
13.1614	43.34
13.1697	43.39
13.1781	43.43
13.1864	43.48
13.1948	43.53
13.2114	43.63
13.2197	43.68
13.228	43.73
13.2364	43.79
13.2447	43.84
13.253	43.9
13.2614	43.94
13.2697	43.98
13.2781	44.03
13.2864	44.06
13.2947	44.09
13.3114	44.17
13.3198	44.2
13.328	44.24
13.3364	44.27
13.3447	44.3
13.353	44.34
13.3614	44.37
13.3697	44.4
13.378	44.43
13.3864	44.46
13.3947	44.48
13.4031	44.5
13.4197	44.54
13.428	44.56
13.4364	44.58
13.4447	44.59
13.453	44.61
13.4614	44.61
13.4697	44.62
13.478	44.64
13.4864	44.64
13.4947	44.66
13.503	44.66
13.5198	44.67
13.5281	44.67
13.5364	44.66
13.5449	44.67
13.5531	44.67
13.5614	44.68
13.5697	44.67
13.578	44.67
13.5864	44.65
13.5947	44.65
13.6031	44.64
13.6197	44.61
13.628	44.6
13.6364	44.6
13.6447	44.6
13.6614	44.57
13.6697	44.55
13.6781	44.54
13.6864	44.51
13.703	44.47
13.7115	44.44
13.7197	44.43
13.7281	44.4
13.7364	44.37
13.7447	44.35
13.753	44.34
13.7614	44.31
13.7697	44.29
13.7781	44.27
13.7947	44.23
13.8031	44.19
13.8114	44.16
13.8197	44.14
13.828	44.11
13.8364	44.07
13.8447	44.05
13.853	44.02
13.8614	43.99
13.8697	43.97
13.8781	43.95
13.8947	43.91
13.903	43.89
13.9114	43.87
13.9197	43.84
13.928	43.82
13.9363	43.8
13.9447	43.78
13.953	43.75
13.9613	43.73
13.9697	43.71
13.978	43.69
13.9947	43.67
14.003	43.67
14.0114	43.66
14.0197	43.65
14.028	43.66
14.0364	43.64
14.0447	43.65
14.053	43.66
14.0613	43.67
14.0697	43.68
14.078	43.69
14.103	43.74
14.1113	43.77
14.1197	43.8
14.128	43.82
14.1364	43.87
14.1447	43.9
14.1531	43.95
14.178	44.1
14.1863	44.16
14.1947	44.23
14.203	44.29
14.2197	44.42
14.228	44.5
14.2364	44.59
14.2447	44.67
14.253	44.77
14.2614	44.86
14.2697	44.96
14.278	45.06
14.2864	45.17
14.2947	45.28
14.303	45.4
14.3197	45.65
14.328	45.77
14.3364	45.9
14.3447	46.03
14.3532	46.17
14.3615	46.31
14.3697	46.45
14.3781	46.6
14.3865	46.75
14.3948	46.9
14.4031	47.05
14.4197	47.36
14.428	47.52
14.4364	47.69
14.4447	47.85
14.453	48.02
14.4697	48.34
14.478	48.5
14.4864	48.67
14.4947	48.83
14.5114	49.17
14.5197	49.32
14.528	49.48
14.5364	49.64
14.5447	49.8
14.5531	49.94
14.5614	50.1
14.5697	50.25
14.578	50.41
14.5864	50.54
14.5947	50.67
14.603	50.8
14.6198	51.05
14.6281	51.16
14.6364	51.27
14.6447	51.37
14.6531	51.47
14.6614	51.56
14.6697	51.66
14.6864	51.81
14.6947	51.88
14.7114	51.97
14.7197	52
14.728	52.04
14.7364	52.07
14.7447	52.09
14.7555	52.11
14.7614	52.1
14.7697	52.09
14.7781	52.07
14.7864	52.04
14.7947	52.02
14.803	51.97
14.8113	51.92
14.8197	51.87
14.828	51.8
14.8364	51.72
14.8447	51.62
14.853	51.52
14.8613	51.41
14.8697	51.28
14.878	51.16
14.8864	51.03
14.8947	50.89
14.9115	50.6
14.9198	50.44
14.928	50.27
14.9364	50.08
14.9448	49.9
14.9531	49.7
14.9697	49.27
14.9781	49.05
14.9864	48.81
15.0031	48.34
15.0114	48.11
15.0197	47.86
15.0304	47.6
15.0364	47.35
15.0447	47.09
15.053	46.82
15.0615	46.54
15.0697	46.27
15.078	45.99
15.0947	45.4
15.103	45.09
15.1114	44.79
15.1197	44.49
15.128	44.19
15.1364	43.87
15.1447	43.57
15.153	43.26
15.1614	42.95
15.1697	42.64
15.1864	42.01
15.1948	41.69
15.203	41.36
15.2115	41.04
15.2198	40.72
15.2282	40.38
15.2364	40.05
15.2471	39.72
15.2614	39.08
15.2697	38.75
15.278	38.43
15.2863	38.11
15.2947	37.79
15.303	37.47
15.3197	36.84
15.328	36.53
15.3363	36.21
15.3447	35.89
15.353	35.57
15.3613	35.25
15.3697	34.94
15.378	34.64
15.3864	34.34
15.3947	34.03
15.403	33.73
15.4114	33.45
15.4197	33.15
15.428	32.86
15.4363	32.57
15.4447	32.29
15.453	32
15.4613	31.71
15.4697	31.42
15.478	31.13
15.4863	30.85
15.4947	30.58
15.503	30.32
15.5113	30.06
15.528	29.53
15.5363	29.27
15.5447	29.02
15.553	28.78
15.5613	28.52
15.5697	28.29
15.578	28.06
15.5947	27.59
15.603	27.35
15.6114	27.11
15.6197	26.89
15.628	26.67
15.6363	26.46
15.6447	26.25
15.6613	25.82
15.6697	25.61
15.678	25.41
15.6863	25.21
15.6947	25.03
15.703	24.84
15.7113	24.66
15.7197	24.49
15.728	24.3
15.7363	24.12
15.7447	23.97
15.753	23.8
15.7697	23.47
15.778	23.33
15.7863	23.17
15.7947	23.04
15.8055	22.9
15.8114	22.77
15.8197	22.64
15.828	22.53
15.8363	22.42
15.8447	22.3
15.853	22.19
15.8697	21.97
15.878	21.89
15.8863	21.79
15.8947	21.71
15.9113	21.57
15.9197	21.51
15.928	21.46
15.9363	21.4
15.9447	21.36
15.953	21.32
15.9613	21.29
15.9697	21.27
15.978	21.24
15.9863	21.22
15.9947	21.2
16.0114	21.2
16.0197	21.19
16.028	21.2
16.0363	21.21
16.0447	21.23
16.053	21.27
16.0614	21.3
16.0697	21.34
16.0863	21.43
16.0947	21.5
16.103	21.56
16.1114	21.62
16.1197	21.68
16.128	21.75
16.1363	21.83
16.1447	21.91
16.153	21.99
16.1613	22.08
16.1697	22.18
16.178	22.27
16.1863	22.36
16.1947	22.47
16.203	22.58
16.2114	22.7
16.2197	22.81
16.228	22.92
16.2363	23.04
16.2447	23.15
16.2613	23.39
16.2697	23.5
16.278	23.62
16.2863	23.74
16.2947	23.86
16.303	23.98
16.3113	24.1
16.3197	24.23
16.328	24.36
16.3363	24.49
16.3447	24.61
16.353	24.74
16.3613	24.87
16.3697	24.98
16.378	25.11
16.3864	25.23
16.3947	25.35
16.403	25.46
16.4113	25.58
16.4197	25.71
16.428	25.82
16.4364	25.94
16.4447	26.06
16.453	26.19
16.4613	26.32
16.478	26.57
16.4863	26.69
16.4947	26.81
16.503	26.93
16.5114	27.04
16.5197	27.16
16.528	27.27
16.5363	27.39
16.5447	27.51
16.553	27.62
16.5697	27.86
16.5782	27.98
16.5863	28.12
16.5947	28.24
16.603	28.37
16.6113	28.5
16.6197	28.63
16.628	28.74
16.6364	28.88
16.6447	29.01
16.653	29.15
16.6697	29.41
16.678	29.55
16.6863	29.69
16.6946	29.84
16.703	30
16.7113	30.16
16.7196	30.32
16.728	30.49
16.7363	30.65
16.7448	30.81
16.7613	31.14
16.7696	31.31
16.778	31.48
16.7863	31.65
16.7946	31.83
16.803	32
16.8113	32.17
16.8196	32.36
16.828	32.56
16.8363	32.76
16.8447	32.97
16.853	33.17
16.8613	33.36
16.8696	33.56
16.878	33.76
16.8863	33.98
16.903	34.39
16.9196	34.81
16.928	35.03
16.9364	35.25
16.9446	35.47
16.953	35.71
16.9613	35.94
16.9697	36.17
16.978	36.41
16.9947	36.87
17.003	37.11
17.0113	37.35
17.0196	37.59
17.028	37.83
17.0363	38.08
17.053	38.54
17.0613	38.77
17.0696	39.01
17.078	39.23
17.0863	39.47
17.0947	39.71
17.103	39.94
17.1197	40.4
17.128	40.63
17.1363	40.85
17.1446	41.07
17.153	41.28
17.1613	41.48
17.1697	41.68
17.178	41.87
17.1864	42.07
17.1946	42.26
17.203	42.46
17.2113	42.64
17.228	43
17.2363	43.16
17.2447	43.31
17.253	43.45
17.2639	43.59
17.2697	43.71
17.278	43.82
17.2863	43.91
17.2947	44.02
17.303	44.1
17.3113	44.16
17.328	44.29
17.3447	44.39
17.353	44.43
17.3613	44.46
17.3697	44.46
17.378	44.46
17.3863	44.45
17.3946	44.43
17.403	44.42
17.4198	44.34
17.428	44.28
17.4363	44.21
17.453	44.06
17.4613	43.98
17.4697	43.89
17.478	43.8
17.4863	43.68
17.4947	43.56
17.503	43.42
17.5113	43.29
17.5196	43.14
17.528	42.99
17.5363	42.85
17.5447	42.71
17.5613	42.36
17.5696	42.19
17.578	42.01
17.5864	41.83
17.5947	41.65
17.603	41.46
17.6114	41.28
17.6197	41.07
17.628	40.86
17.6363	40.64
17.6446	40.42
17.653	40.2
17.6613	39.98
17.6697	39.76
17.678	39.54
17.6863	39.31
17.6946	39.08
17.703	38.85
17.7113	38.62
17.7197	38.39
17.728	38.15
17.7363	37.92
17.7447	37.67
17.753	37.42
17.7613	37.16
17.7696	36.92
17.778	36.67
17.7863	36.42
17.7947	36.19
17.803	35.94
17.8196	35.44
17.828	35.18
17.8363	34.93
17.8447	34.68
17.853	34.44
17.8697	33.92
17.878	33.66
17.8863	33.4
17.8946	33.14
17.903	32.9
17.9197	32.41
17.928	32.17
17.9363	31.91
17.9447	31.67
17.953	31.43
17.9613	31.18
17.9697	30.95
17.9863	30.49
17.9947	30.25
18.003	29.99
18.0114	29.75
18.0197	29.51
18.028	29.28
18.0363	29.06
18.053	28.64
18.0613	28.41
18.0696	28.19
18.078	27.98
18.0863	27.78
18.0946	27.59
18.103	27.38
18.1196	26.98
18.1279	26.79
18.1363	26.59
18.1446	26.4
18.153	26.2
[truncated: 488 more rows]
