# Supplementary material for: Structural insights into hormone recognition by the human glucose-dependent insulinotropic polypeptide receptor
Source: eLife journal article supplement (doi:10.7554/elife.68719), 2021-07-13
Supplement: supp [file Figure 1—figure supplement 1F-source data 1.xlsx]

## Sheet: Figure 1—figure supplement 1F
Figure 1—figure supplement 1F-source data 1
			GIP1-42-hGIPR(22-421)(T345F)-15AA-LgBiT-Gs complex
