# Supplementary material for: Structural insights into hormone recognition by the human glucose-dependent insulinotropic polypeptide receptor
Source: eLife journal article supplement (doi:10.7554/elife.68719), 2021-07-13
Supplement: supp [file Figure 1—figure supplement 1G-source data 1.xlsx]

## Sheet: Figure 1—figure supplement 1G
Figure 1—figure supplement 1G-source data 1
	Log [GIP1-42] M	Wide-type				BRIL-GIPR (22-421)T345F-15AA-LgBiT-2MBP				pcDNA3.1
	-8	96.3422	97.9098	97.9116		98.8432	99.7565	99.7799		3.51091	9.61869	2.75354	9.01936
	-9	96.1908	97.6064	98.0154		98.7092	99.6075	99.7018		-0.27004	5.9698	-1.04708	4.80505
	-10	94.7378	96.4579	96.6862		97.625	98.9557	98.8338		1.26283	3.99654	0.493767	4.62507
	-11	92.6623	86.1327	86.616		96.0447	92.535	90.9483		2.05772	2.78631	1.29279	3.67038
	-12	4.4717	17.5859	16.9693		10.8024	28.4788	24.3539		0.736893	3.12697	-0.0349038	4.71602
	-13	3.99093	1.07029	-4.90366		4.08673	-1.84042	20.6783		1.32229	3.42064	0.553541	5.11825
	-14	2.20775	2.98281	2.41319		3.17418	9.14194	8.16165		0.273986	4.61721	-0.50022	5.67607
	-15	6.99034	3.35692	3.27102		4.38793	7.9768	8.91583		2.61507	6.19418	1.85305	0.18151
