# Supplementary material for: Structural insights into hormone recognition by the human glucose-dependent insulinotropic polypeptide receptor
Source: eLife journal article supplement (doi:10.7554/elife.68719), 2021-07-13
Supplement: supp [file Figure 1—figure supplement 1H-source data 1.xlsx]

## Sheet: Figure 1—figure supplement 1H
Figure 1—figure supplement 1H-source data 1
Log [GIP1-42] M	WT					pcDNA3.1					BRIL-GIPR (22-421)T345F -15AA-LgBiT-2MBP
-6	-0.800348	-0.514925	2.7782	-0.366727	1.01385	3.22056	1.62728	2.34296					-0.260405	5.68347	2.75191
-6.77815	4.67397	4.20385	4.54256	7.87867	6.33028	0.650563	2.34296	1.32057					-0.456444	7.23617	3.7743
-7.5563	16.3322	23.6688	29.1455	34.4353	29.6408	0.54348	4.38774	2.34296					10.7178	10.4487	10.7266
-8.33445	54.7538	58.9612	69.6276	69.3444	69.4118	1.07889	1.83176	3.05863					24.3425	24.6907	35.5707
-9.11261	84.2543	90.2231	98.2493	97.7214	97.0164	3.43472	5.00117	2.75191					43.6524	38.558	50.3953
-9.89076	106.354	108.508	104.327	101.309	101.004	1.45369	3.7743	3.56983					47.5732	40.6996	63.3797
-10.6689	112.031	113.915	105.895	101.041	104.991	2.14973	3.97878	4.89893					58.0613	44.1798	70.3319
-11.4471	81.8213	77.0499	85.2127	95.5262	90.5753	2.84577	6.73924	3.05863					43.2603	42.4665	62.7663
