# Supplementary material for: Structural insights into hormone recognition by the human glucose-dependent insulinotropic polypeptide receptor
Source: eLife journal article supplement (doi:10.7554/elife.68719), 2021-07-13
Supplement: supp [file Figure 2D-source data 1.xlsx]

## Sheet: Figure 2D
Figure 2D-source data 1
Log[ligand(M)]	WT												W39A				L35A				D66A				Y68A				Y87A			L88A
-8	104.723	99.3238	100.565	100.81	101.393	103.157	102.552	102.467	103.392	97.7058	97.8174	96.7447	26.5313	26.7258	27.2746	41.7052	96.6783	99.493	99.8871	99.3776	4.23778	3.62726	4.9188	-0.636498	52.5211	54.7276	62.212	68.2107	10.5023	10.9265	6.05864	11.0202	15.8907	14.7591
-9	102.081	98.3898	98.3355	99.1081	99.2732	96.1151	97.6001	98.8296	96.6923	97.9655	98.0418	97.0356	2.16144	7.5678	-4.26601	-0.139008	89.9395	94.2715	96.6357	90.0855	3.27182	3.8431	1.69197	-1.89125	9.38679	11.5083	5.47883	12.0717	10.6087	8.33609	4.27642	8.20599	9.51125	10.9483
-10	86.7942	94.9522	86.7779	86.6377	87.5678	93.3406	94.3075	96.939	91.7523	96.9946	97.4201	96.5532	-0.323251	5.59686	-5.83132	-0.93635	58.2994	51.0656	66.3933	37.9829	2.11858	2.92617	2.58563	-1.00731	3.65161	6.4351	-1.68432	5.58153	8.61605	7.57827	1.62477	8.2495	10.4569	9.45699
-11	66.7625	58.6016	42.6062	46.5329	53.0867	72.3082	65.5062	66.1038	61.3808	90.8852	92.7645	91.4356	0.788235	4.88154	-5.64327	-0.466235	4.20202	5.95166	10.4759	1.62527	3.97346	1.78861	0.0127268	-2.44356	3.77098	8.2115	-0.549478	4.13751	9.27266	6.97314	5.1785	8.13698	10.4514	10.1872
-12	8.63302	10.6421	3.39292	1.92074	0.716662	10.2545	17.0522	28.0352	9.44371	27.6523	33.7374	18.0691	1.82333	5.32146	-4.72198	0.981998	0.628098	1.96361	6.6842	0.437931	3.77903	1.86516	2.18785	-0.959017	4.70992	5.32884	-2.58952	2.91803	9.80477	8.52041	3.83846	7.49643	11.8572	9.69457
-13	2.03152	2.04505	0.460983	1.54565	2.37467	1.83192	-0.00130112	13.958	0.848288	2.93521	3.47772	4.75497	-1.60895	4.16835	-5.60791	0.912937	-0.0712301	2.72083	6.96744	-0.606563	3.32129	2.05433	1.75516	-0.858572	4.66165	4.49131	-2.01745	2.40522	9.54128	8.22194	5.23035	8.18452	11.3608	9.12743
-14	1.44589	0.198637	1.32788	0.890038	1.59024	2.80825	-0.389298	11.3667	0.532059	2.49197	3.76946	3.77085	-0.211711	4.72924	-4.14265	1.80794	0.906037	3.32901	6.48636	1.54295	3.34151	2.35772	4.06053	-0.897865	5.27453	5.4517	0.554274	5.71195	9.49574	9.10247	5.91713	9.30955	12.6149	10.4043
-15	1.81653	0.501776	1.38853	2.41332	3.03495	1.82055	1.76533	12.7267	2.2004	1.53822	-0.0343136	0.324788	0.835814	4.40176	-5.09241	-1.23778	1.18647	2.68378	6.3816	0.396619	4.46615	2.5967	4.24049	0.637267	7.0977	8.47445	2.11613	5.91626	10.9947	11.988	8.59785	11.7977	12.896	12.7186
Log[ligand(M)]	WT												N120A				E122A				L134A			T345F				Δ29				Δ43			Δ52
-8	104.723	99.3238	100.565	100.81	101.393	103.157	102.552	102.467	103.392	97.7058	97.8174	96.7447	104.278	99.0631	101.242	100.238	105.206	100.613	98.3228	99.793	98.06	96.9214	97.6717	100.423	95.9931	99.102	97.6113	104.297	96.7935	100.963	102.43	17.9115	10.3628	18.3241	19.925	15.6505	20.2855
-9	102.081	98.3898	98.3355	99.1081	99.2732	96.1151	97.6001	98.8296	96.6923	97.9655	98.0418	97.0356	99.1034	92.4109	97.9434	96.2314	101.534	96.6139	95.9788	96.6749	93.9673	90.9722	85.3105	99.2831	93.4887	98.0144	95.1204	100.029	91.5427	96.7648	101.537	14.8311	9.09803	15.3235	14.954	12.4379	15.4432
-10	86.7942	94.9522	86.7779	86.6377	87.5678	93.3406	94.3075	96.939	91.7523	96.9946	97.4201	96.5532	57.3541	53.0905	70.6074	66.055	76.333	65.6173	76.7633	77.0713	64.4414	59.2819	48.6687	84.6917	76.8813	88.07	81.3818	96.9494	87.438	90.2405	100.028	13.6819	7.85781	14.204	14.1141	12.5426	14.6251
-11	66.7625	58.6016	42.6062	46.5329	53.0867	72.3082	65.5062	66.1038	61.3808	90.8852	92.7645	91.4356	34.5148	37.9057	29.8994	32.8778	53.8174	43.8089	13.7315	35.2621	22.2388	13.7553	7.28554	63.5458	58.219	49.545	39.1282	81.83	62.1874	67.3777	87.9273	14.7926	7.25494	15.286	15.9093	11.6078	16.3738
-12	8.63302	10.6421	3.39292	1.92074	0.716662	10.2545	17.0522	28.0352	9.44371	27.6523	33.7374	18.0691	8.19391	3.84364	9.09591	2.38686	8.57124	9.92816	4.75856	4.20451	13.0382	8.78334	3.67254	7.07025	3.13801	7.11546	2.51131	26.2902	13.1936	33.8759	37.322	16.0993	10.3512	16.5589	18.2023	12.0428	18.6074
-13	2.03152	2.04505	0.460983	1.54565	2.37467	1.83192	-0.00130112	13.958	0.848288	2.93521	3.47772	4.75497	6.94274	6.5194	6.24616	4.48742	8.14808	10.3488	1.99209	1.48821	14.9951	9.85222	4.70534	4.78527	3.20146	4.76542	0.469415	14.7689	3.81367	15.8785	21.6443	16.1492	9.84775	16.6075	18.2232	14.4096	18.6278
-14	1.44589	0.198637	1.32788	0.890038	1.59024	2.80825	-0.389298	11.3667	0.532059	2.49197	3.76946	3.77085	6.78822	4.9339	9.73668	5.68611	9.82965	10.1885	1.84854	2.41107	16.1908	9.23033	3.83385	3.52809	2.56067	6.8803	1.11713	15.6921	5.12776	14.9842	19.8682	15.7922	11.3473	16.2597	19.1262	14.0885	19.5074
-15	1.81653	0.501776	1.38853	2.41332	3.03495	1.82055	1.76533	12.7267	2.2004	1.53822	-0.0343136	0.324788	8.6299	7.9669	11.4553	5.93233	11.1685	16.2932	0.0381208	4.79311	13.8823	8.54801	5.78494	3.11922	3.05397	7.15499	2.40141	15.7114	5.96062	14.7973	20.4492	18.933	14.5207	19.3192	22.0687	19.2481	22.3737
Log[ligand(M)]	WT												Y141A			R289A			W296A			R370A			L374A			I378A
-8	97.7058	97.8174	96.7447	104.723	99.3238	100.565	100.81	101.393	103.157	102.552	102.467	103.392	93.0708	92.5341	95.0758	96.7034	97.7786	96.4518	95.8673	97.1372	95.8063	96.5209	96.1886	95.0483	96.7996	97.1192	95.3224	97.1754	97.6857	96.2731
-9	97.9655	98.0418	97.0356	102.081	98.3898	98.3355	99.1081	99.2732	96.1151	97.6001	98.8296	96.6923	61.6363	67.4898	77.4337	94.6035	96.7856	95.0458	85.871	89.8061	88.5026	89.1748	86.4428	85.2095	89.1757	90.4981	88.9156	94.5519	95.6727	94.5536
-10	96.9946	97.4201	96.5532	86.7942	94.9522	86.7779	86.6377	87.5678	93.3406	94.3075	96.939	91.7523	6.41479	10.1027	9.37723	78.001	85.0983	85.0308	19.0356	23.6747	24.798	20.1507	15.494	15.4179	28.854	23.813	25.0397	76.0437	73.4477	74.7618
-11	90.8852	92.7645	91.4356	66.7625	58.6016	42.6062	46.5329	53.0867	72.3082	65.5062	66.1038	61.3808	-4.23259	4.92962	1.50017	8.35497	12.5439	11.7982	-0.933589	3.60602	0.64232	4.42562	-0.169241	-2.88837	0.112023	-1.63579	-4.20103	8.40561	10.1398	11.3838
-12	27.6523	33.7374	18.0691	8.63302	10.6421	3.39292	1.92074	0.716662	10.2545	17.0522	28.0352	9.44371	-2.24601	1.79429	3.65716	-0.1869	-3.8863	4.92862	1.66798	1.02057	3.94298	0.367788	-2.72021	-1.35871	-0.782273	-1.92414	-4.07254	-0.438064	3.09297	7.03431
-13	2.93521	3.47772	4.75497	2.03152	2.04505	0.460983	1.54565	2.37467	1.83192	-0.00130112	13.958	0.848288	-0.554437	5.50488	2.40733	0.0679759	-4.54375	-0.791171	1.30286	1.39495	-1.11237	1.40377	-3.13229	-4.94964	-1.00739	-2.29803	-5.0738	0.216751	3.71669	4.32437
-14	2.49197	3.76946	3.77085	1.44589	0.198637	1.32788	0.890038	1.59024	2.80825	-0.389298	11.3667	0.532059	2.18808	1.61123	2.00718	-1.96418	-5.44036	-3.59638	1.66148	1.68157	-3.48934	0.511647	-4.16988	-4.97851	-1.88077	-0.480767	-8.76002	0.61389	3.41975	3.4907
-15	1.53822	-0.0343136	0.324788	1.81653	0.501776	1.38853	2.41332	3.03495	1.82055	1.76533	12.7267	2.2004	-3.60938	0.730433	0.699157	-1.80452	-5.7191	-3.2768	-1.01547	0.606855	-1.95762	-1.37681	-4.72137	-4.72829	-0.175212	-0.245461	-9.16913	0.58797	3.60358	3.77595
