# Supplementary material for: Structural insights into hormone recognition by the human glucose-dependent insulinotropic polypeptide receptor
Source: eLife journal article supplement (doi:10.7554/elife.68719), 2021-07-13
Supplement: supp [file Figure 2—figure supplement 1-source data 1.xlsx]

## Sheet: Figure 2—figure supplement 1
Figure 2—figure supplement 1-source data 1
			Log [ligand] (M)	WT			L35A			W39A			D66A			Y68A			Y87A			L88A
			-5	96.8665	92.6588	98.9301	105.356	88.5987	92.2746	4.4699	4.99832	9.31713	10.1127	2.77479	4.13044	42.932	45.0546	52.0466	8.29393	2.39058	5.61891	2.70097	5.53785	5.59924
			-5.90309	103.693	106.256	101.291	83.5655	81.9772	83.8159	4.05424	14.3148	9.8253	11.6948	9.7206	5.94021	30.3363	44.8093	28.2541	9.82305	3.88383	4.88123	7.44247	14.8543	3.65177
			-6.80618	80.8196	89.6614	76.5375	44.6701	40.6947	24.3428	2.14499	3.48054	0.732867	5.51534	1.52133	2.69115	14.1786	9.66065	11.6383	14.098	5.66047	1.623	3.83256	7.79408	1.3735
			-7.70927	45.2244	55.1368	39.6537	19.2169	9.93042	5.23532	4.21547	2.61402	2.23543	9.83312	4.48059	2.64853	7.48781	3.53504	3.21244	15.8715	5.27354	4.47141	2.4352	3.2898	4.1829
			-8.61236	3.80989	8.74235	3.52391	6.92857	2.83201	0.67287	3.10957	3.89473	3.65505	5.75465	2.10446	2.29445	10.6317	3.44239	5.06811	9.12021	1.06627	1.962	1.30764	5.11004	1.59185
			-9.51545	1.59456	7.09378	3.48129	9.35701	6.49157	3.18622	3.0617	2.83746	4.52059	6.9462	9.91952	6.92705	12.2313	6.49975	6.51723	8.86074	3.31705	8.92042	2.70827	7.26272	2.02331
			-10.4185	2.08428	0.537634	-0.0556267	10.8257	2.23798	1.14006	1.9087	2.88651	0.33944	12.5739	4.07457	2.59607	7.10239	1.46955	1.65414	13.6824	6.03379	2.0361	1.17261	7.50524	3.33703
			-11.3216	0.409062	-2.63144	-1.06608	0.409062	-2.63144	-1.06608	0.409062	-2.63144	-1.06608	0.409062	-2.63144	-1.06608	0.409062	-2.63144	-1.06608	0.409062	-2.63144	-1.06608	0.409062	-2.63144	-1.06608
			Log [ligand] (M)	WT			N120A			E122A			L134A			T345F			Δ29			Δ43			Δ52
			-5	96.8665	92.6588	98.9301	63.8911	77.1813	77.0621	70.6424	68.5706	62.5708	46.0809	37.3158	56.8333	70.8439	75.5191	105.553	84.6487	64.2925	72.5704	4.37921	-0.0893694	2.03315	2.8307	0.390488	3.69767
			-5.90309	103.693	106.256	101.291	49.3557	76.8543	68.4066	63.5384	78.1895	63.2921	46.3328	44.3461	48.4074	76.8898	81.3504	98.2416	83.6663	74.2384	65.751	11.8787	4.87842	8.10406	2.0669	3.55411	5.09762
			-6.80618	80.8196	89.6614	76.5375	44.1159	62.3305	46.4403	42.4533	54.4828	40.0799	29.1271	23.1381	18.0611	57.82	65.7639	68.3739	71.8264	52.6843	49.2271	2.70903	1.49135	2.82229	2.10015	3.81571	5.55989
			-7.70927	45.2244	55.1368	39.6537	13.4909	30.8305	22.4412	18.9851	20.0862	14.9431	16.4156	10.8787	6.1861	25.1797	29.5498	23.9297	25.6003	23.4923	19.1036	2.73926	3.01731	2.11708	2.91912	0.995419	4.74025
			-8.61236	3.80989	8.74235	3.52391	4.21798	5.23266	2.15445	5.01151	2.85109	0.551563	3.17758	-0.797575	3.65833	2.63043	1.47773	2.90754	11.7905	0.750177	0.792209	2.43822	3.15355	1.16728	2.64504	2.34698	3.08786
			-9.51545	1.59456	7.09378	3.48129	3.1398	11.4809	7.87784	7.39712	9.00395	2.10036	3.76958	6.64962	3.76652	3.06926	-0.16485	1.11384	6.80261	4.60321	2.59607	3.73683	1.94641	2.06987	1.48146	3.08815	6.2779
			-10.4185	2.08428	0.537634	-0.0556267	6.71696	1.88102	1.89151	4.43211	-1.6859	0.208625	4.09455	1.11532	1.40989	2.75714	-0.459958	1.36596	12.3195	0.0316169	-0.0975923	3.40179	-0.7052	-0.0608724	1.6782	5.39343	1.62398
			-11.3216	0.409062	-2.63144	-1.06608	0.409062	-2.63144	-1.06608	0.409062	-2.63144	-1.06608	0.409062	-2.63144	-1.06608	0.409062	-2.63144	-1.06608	0.409062	-2.63144	-1.06608	0.409062	-2.63144	-1.06608	0.409062	-2.63144	-1.06608
			Log [ligand] (M)	WT			Y141A			R289A			W296A			R370A			L374A			I378A
			-5	96.8665	92.6588	98.9301	11.007	7.3908	15.6546	60.3391	49.7142	68.5706	11.3194	6.64144	6.71723	14.8235	14.4647	18.7495	51.4718	42.4659	46.3747	20.9097	40.4767	71.3901
			-5.90309	103.693	106.256	101.291	13.2465	11.7043	19.979	52.5802	55.709	58.0464	11.3899	12.8297	10.6351	22.1869	25.4624	23.0773	36.8357	38.1878	29.3196	26.5072	63.0118	47.1288
			-6.80618	80.8196	89.6614	76.5375	3.73431	1.5731	7.58605	33.1829	28.6778	19.8151	9.63915	6.14006	3.96651	5.88313	8.00663	5.45498	21.3884	27.8604	20.5593	14.025	5.27899	12.7104
			-7.70927	45.2244	55.1368	39.6537	3.90057	4.45061	8.22537	20.5923	5.03102	2.88131	9.62655	3.00096	2.2715	6.91345	6.49975	2.81902	9.19578	12.8379	1.38792	8.01935	28.2963	14.7661
			-8.61236	3.80989	8.74235	3.52391	2.92643	-0.892947	3.8157	7.67675	1.58945	-0.0103825	8.62898	0.780151	0.0460087	2.78788	0.581232	0.910238	5.88313	14.5546	3.64521	10.3621	0.210644	5.12057
			-9.51545	1.59456	7.09378	3.48129	1.76687	3.86476	3.21572	14.5766	1.78837	3.46161	3.52522	0.573058	0.537465	3.61591	5.68772	1.35547	6.67162	8.29819	1.42104	1.03305	5.5106	7.73358
			-10.4185	2.08428	0.537634	-0.0556267	1.5792	-0.322895	2.20822	12.4908	-0.0599403	-0.597901	7.7498	0.248793	-0.19431	1.53436	-0.401372	1.52661	11.463	0.66298	2.14921	11.8459	-2.63144	-0.455611
			-11.3216	0.409062	-2.63144	-1.06608	0.409062	-2.63144	-1.06608	0.409062	-2.63144	-1.06608	0.409062	-2.63144	-1.06608	0.409062	-2.63144	-1.06608	0.409062	-2.63144	-1.06608	0.409062	-2.63144	-1.06608
