# Supplementary material for: Structural insights into hormone recognition by the human glucose-dependent insulinotropic polypeptide receptor
Source: eLife journal article supplement (doi:10.7554/elife.68719), 2021-07-13
Supplement: supp [file Figure 4—figure supplement 4-source data 1.xlsx]

## Sheet: Figure 4—figure supplement 4
Figure 4—figure supplement 4-source data 1
GIPR
Log[ligand] (M)	GIP1-42			GLP-17-36			Glucagon
-8	98.4415	99.0518	98.9803	2.27897	11.3392	14.46	2.27897	8.53742	9.41328
-9	97.6009	98.3633	98.4549	1.73249	9.94862	8.82186	1.73249	6.10927	6.41062
-10	91.0226	93.6376	93.2177	0.807465	6.4627	4.15273	0.807465	7.13607	5.65718
-11	41.0106	52.1174	51.0828	0.357583	1.17655	-0.462155	0.357583	7.36054	3.08333
-12	3.98717	9.03562	8.60148	-0.0937008	5.40952	3.05343	-0.0937008	10.2499	4.36505
-13	-0.528224	0.909264	-0.26035	4.82171	1.02618	-1.65765	4.82171	6.08305	1.26407
-14	1.38801	0.741541	0.482146	6.86364	1.93878	-0.301573	6.86364	5.34947	1.49711
-15	2.43161	0.308231	1.70034	-1.00942	2.74775	0.590921	-1.00942	5.33198	2.30906
GLP-1R
Log[ligand] (M)	GIP1-42			GLP-17-36			Glucagon
-8	6.91966	5.26974	8.77412	97.4476	98.0155	98.0534	93.9071	91.7482	91.4697
-9	5.11096	5.17823	6.76896	97.3691	97.7852	97.7691	61.0963	45.0389	46.1862
-10	4.13877	4.37292	6.43353	96.0906	96.1381	96.0899	8.94506	8.99248	11.6887
-11	3.6632	3.92689	2.54589	83.9055	78.9458	78.9134	4.18887	3.90333	4.33281
-12	4.72214	6.56026	6.00537	9.08983	8.97619	8.76718	4.40307	3.7511	5.06899
-13	3.93556	2.36888	2.42374	4.07739	2.21187	2.63479	3.22688	3.91218	3.45629
-14	4.12924	1.33945	3.1462	2.10234	2.69806	3.2923	3.59816	4.74034	5.37402
-15	4.23241	4.01244	4.41005	3.77679	3.90271	3.0012	3.25092	7.22459	6.39853
GCGR
Log[peptide 20] (M)	GIP1-42			GLP-17-36			Glucagon
-8	4.77563	9.88164	12.9664	1.18808	8.07478	9.40645	97.1079	104.97	105.125
-9	1.90273	2.00159	4.547	2.65752	3.90967	5.31192	95.3536	102.396	102.441
-10	2.74203	1.40112	3.39309	1.64047	1.07799	3.0177	82.3298	81.5381	81.0745
-11	1.65609	-0.886075	2.0307	2.41014	-2.182	1.28329	44.9837	45.7185	43.3123
-12	1.65735	1.11874	1.6276	0.819505	0.599509	2.41255	2.99917	2.56862	3.37812
-13	2.19223	0.830635	1.68327	0.861603	-3.39092	-0.912751	0.336899	5.99138	4.90038
-14	1.2949	1.02667	2.45538	-0.496509	0.0600446	-0.858996	4.1093	1.69356	1.71109
-15	1.06116	3.10904	4.24715	1.28925	1.75717	2.24502	0.980059	0.405689	0.297257
